# Supplementary material for: Impact of mobile applications on adherence to cancer treatment: a systematic review and meta-analysis protocol
Source: PubMed Central journal article supplement — BMJ Open. 2019 Nov 7;9(11):e027246. doi: 10.1136/bmjopen-2018-027246 (PMC6858102; doi:10.1136/bmjopen-2018-027246), 2019-11-07
Supplement: bmjopen-2018-027246.draft_revisions.pdf [file bmjopen-2018-027246.draft_revisions.pdf]

# BMJ Open

BMJ Open is committed to open peer review. As part of this commitment we make the peer review history of every article we publish publicly available.

When an article is published we post the peer reviewers' comments and the authors' responses online. We also post the versions of the paper that were used during peer review. These are the versions that the peer review comments apply to.

The versions of the paper that follow are the versions that were submitted during the peer review process. They are not the versions of record or the final published versions. They should not be cited or distributed as the published version of this manuscript.

BMJ Open is an open access journal and the full, final, typeset and author-corrected version of record of the manuscript is available on our site with no access controls, subscription charges or pay-per-view fees (<http://bmjopen.bmj.com>).

If you have any questions on BMJ Open's open peer review process please email [info.bmjopen@bmj.com](mailto:info.bmjopen@bmj.com)

# BMJ Open

## The Impact of Mobile Applications on Adherence to Cancer Treatment: a Systematic Review Protocol

|                               |                                                                                                                                                                                                                                                                                                                                                                                                                                                                                                                                                            |
|-------------------------------|------------------------------------------------------------------------------------------------------------------------------------------------------------------------------------------------------------------------------------------------------------------------------------------------------------------------------------------------------------------------------------------------------------------------------------------------------------------------------------------------------------------------------------------------------------|
| Journal:                      | <i>BMJ Open</i>                                                                                                                                                                                                                                                                                                                                                                                                                                                                                                                                            |
| Manuscript ID                 | bmjopen-2018-027246                                                                                                                                                                                                                                                                                                                                                                                                                                                                                                                                        |
| Article Type:                 | Protocol                                                                                                                                                                                                                                                                                                                                                                                                                                                                                                                                                   |
| Date Submitted by the Author: | 21-Dec-2018                                                                                                                                                                                                                                                                                                                                                                                                                                                                                                                                                |
| Complete List of Authors:     | Medeiros, Kleyton ; Universidade Federal do Rio Grande do Norte<br>Queiroz, Janice; Universidade Federal do Rio Grande do Norte Centro de Ciencias da Saude<br>Sarmiento, Ayane Cristine ; Universidade Federal do Rio Grande do Norte<br>Costa, Weruska; Universidade Federal do Rio Grande do Norte Centro de Ciencias da Saude<br>Cobucci, Ricardo; Universidade Potiguar Unidade Salgado Filho<br>Stransky, Beatriz; Universidade Federal do Rio Grande do Norte Centro de Tecnologia<br>Gonçalves, Ana ; Universidade Federal do Rio Grande do Norte, |
| Keywords:                     | mobile application, medication adherence, oral anticancer agents, Health informatics < BIOTECHNOLOGY & BIOINFORMATICS, patient compliance                                                                                                                                                                                                                                                                                                                                                                                                                  |
|                               |                                                                                                                                                                                                                                                                                                                                                                                                                                                                                                                                                            |

SCHOLARONE™  
Manuscripts

1  
2  
3 **1 The Impact of Mobile Applications on Adherence to Cancer Treatment: a**  
4 **2 Systematic Review Protocol**  
5  
6  
7

8 4 Kleyton Santos de Medeiros<sup>1</sup>, Janice França Queiroz<sup>1</sup>, Ayane Cristine Alves  
9 5 Sarmiento<sup>1</sup>, Weruska Alcoforado Costa<sup>1</sup>, Ricardo Ney Cobucci<sup>2</sup>, Beatriz  
10 6 Stransky<sup>3</sup>, Ana Katherine da Silveira Goncalves<sup>1,2</sup>  
11  
12  
13  
14

15 8 <sup>1</sup>Postgraduate Program in Health Sciences, Federal University of Rio Grande do  
16 9 Norte, Natal, Brazil.

17  
18  
19 10 <sup>2</sup> Department of Gynecology and Obstetrics, Potiguar University, UnP Natal,  
20 11 Brazil.  
21

22  
23  
24 12 <sup>3</sup>Department of Gynecology and Obstetrics, Federal University of Rio Grande do  
25 13 Norte, Natal, Brazil.  
26  
27

28  
29 14 <sup>4</sup> Department of Biomedical engineering, Federal University of Rio Grande do  
30 15 Norte, Natal, Brazil.  
31  
32

33  
34  
35  
36 17 \*Corresponding author:

37  
38 18 Ana Katherine Gonçalves

39  
40 19 E-mail address: anakatherine\_ufrnet@yahoo.com.br  
41  
42

43  
44  
45 21 Conflict of Interest statement: None  
46  
47

48 22

49  
50 23

51  
52 24

53  
54 25

55  
56 26

57  
58 27

59  
60

## 28 **ABSTRACT**

### 29 **Introduction**

30 About 25% of new antineoplastic agents in development are estimated to be  
31 oral drugs. Once an antineoplastic agent is ordered, the administration is the  
32 responsibility of the patient and this has created significant safety and  
33 adherence issues. To overcome these difficulties, oncology nurses can use  
34 tools and technology to assist with education, which may promote adherence  
35 with the suggestion of reminder tools that can be used. This review aims to  
36 assess the efficacy of mobile applications to improve the adherence to  
37 medication in cancer treatment.

### 38 **Methods and analysis**

39 The databases MEDLINE, Embase, SciELO, Scopus and Cochrane Database  
40 of Systematic Reviews will be used to search for articles from January 2018.  
41 Clinical Trials, Controlled Clinical Trials, Randomized Controlled Trials using  
42 mobile applications in patients to aid adherence to medication in cancer  
43 treatment will be included. The primary outcome will be the better adherence to  
44 medication in cancer treatment. The secondary outcome will be Improvement in  
45 Self-care, improved quality of life and control of signs and symptoms. Three  
46 independent reviewers will select trials and extract data from the original  
47 publications. The risk of bias will be assessed according to the Cochrane Risk  
48 of Bias tool. Data synthesis will be performed using Review Manager software  
49 (RevMan V.5.2.3). To assess heterogeneity, we will compute the I<sup>2</sup> statistic.  
50 The heterogeneity of the studies will be evaluated in the funnel plot.  
51 Additionally, a quantitative synthesis will be used if the included studies are  
52 sufficiently homogenous.

### 53 **Ethics and dissemination**

54 This study will be a review of the published data and thus it is not necessary to  
55 obtain ethical approval. Findings of this systematic review will be published in a  
56 peer-reviewed journal.

### 57 **Trial registration number**

58 International Prospective Register of Systematic Reviews 2018:  
59 CRD42018102172.

## 62 **Strengths and limitations of this study**

63 - The results obtained from this systematic review will propose which strategy is  
64 most useful for the improvement of adherence to oral chemotherapeutic  
65 treatment, choosing between mobile app and others methods.

66 - Two reviewers will independently select the eligibility trials to be included in  
67 this review, extract data without different variables and assess the risk of bias

68 - Our review and meta-analysis aims to combine the results of different studies  
69 that have comparable effect sizes that can be computed. However, it may be  
70 that we will only get a small sample size and a limited number of studies, which  
71 may influence the validity and reliability of the findings.

72 - Our review would be limited by variation of strategies for adherence to oral  
73 chemotherapy and quality of the randomized trials used in the systematic  
74 review.

## 76 **Introduction**

### 77 **Description of the condition**

78 About 25% of new antineoplastic agents in development are estimated to be  
79 oral drugs, and the number of available oral chemotherapy medications is  
80 expected to more than double over the next few years (1-3). Oral therapy is  
81 often preferred by patients to IV therapy for several reasons. The benefits of  
82 oral agents for cancer are: patient preference, convenience of use, easier  
83 administration and more convenience for patients because they result in fewer  
84 office visits and less time spent receiving treatment compared to IV  
85 chemotherapy (4,5). Additionally, oral therapy can provide a feeling of control  
86 over treatment, decrease treatment interference with work and social activities,  
87 eliminating the travel time needed to go to an infusion clinic, and eliminate the  
88 discomfort of having an IV line inserted for each administration (2). Once an  
89 antineoplastic agent is ordered, the administration is the responsibility of the  
90 patient (5). However, the problem of non-adherence to treatment and  
91 pharmacological limitations are still poorly studied (3).

### 93 **Description of the intervention**

94 Oncology nurses can use tools and technology to assist with education, which  
95 may promote adherence with the suggestion of reminder tools that can be used.

1  
2  
3 96 Many have already been developed: patient education; physical devices such  
4 97 as pillboxes and glowing pill bottles; or computer and mobile applications (apps)  
5 98 to work as electronic reminders, such as calendars, text messaging, and  
6 99 alarms (5). This article aims to verify if the use of mobile applications improves  
7 100 the patient in adherence to medication in cancer treatment.  
8  
9  
10  
11  
12

### 102 **How the intervention might work**

103 Mobile applications are computer programs or software installed on mobile  
104 electronic devices which support a wide range of functions and uses which  
105 include television, telephone, video, music, word processing, and Internet  
106 service (6). Based on the researchers' analysis of available apps, medication  
107 reminder apps were first developed in 2009 (5). For the purpose of this study,  
108 the mobile application will replicate (or show, inform) the medical and nursing  
109 orientations for use of oral chemotherapy drugs at home, i.e., how to take, the  
110 principle reactions, and principle interactions. Additionally, they will remind the  
111 patient to take the medication at the right time and right dose as prescribed (7).  
112

### 113 **Why it is important to perform this review**

114 It was estimated that the compliance rate for long-term medication therapies  
115 was 40% to 50%. The rate of compliance for short-term therapy was much  
116 higher at 70% to 80%, while the compliance with lifestyle changes was the  
117 lowest, at 20% to 30% (8). Presently, the average rate of non-adherence to oral  
118 anti-cancer therapy is estimated to be around 21% (4), that is, poor adherence  
119 is a barrier to completing the treatment (9,10). Non-adherence is complex and  
120 systemic, as well as this, at home there is no professional oversight to know  
121 whether patients are properly taking the medication as prescribed. Oral  
122 regimens may come with complicated dosing schedules or multiple food and  
123 drug interactions that make adherence difficult. In busy clinics, patients may be  
124 given written materials about the new medication, but little time may be  
125 available for one-on-one interaction (5). Ensuring patient adherence to a  
126 treatment that involves self-administration is a challenge that is faced by health  
127 care providers (2,11). Many factors can affect the treatment adherence: lack of  
128 understanding regarding proper administration, complex dosing regimens,  
129 administration of other potentially interacting medications, timing of treatment

1  
2  
3 130 doses in relation to food intake, cost of the drug, and unpleasant side effects.  
4  
5 131 Furthermore, common health conditions of the patients such as visual and  
6  
7 132 cognitive impairment, memory deficits or forgetfulness can pose another  
8  
9 133 difficulties (2). In this context, it is necessary to verify if the use of mobile  
10  
11 134 applications can help the patient to overcome those difficulties and improve the  
12  
13 135 adherence to treatment. Despite the increased use of oral chemotherapy, the  
14  
15 136 number of studies addressing the issue of adherence remains surprisingly low  
16  
17 137 (11).

138

### 139 **Objectives**

140 The objective of the study is to systematically review and, if possible, perform a  
141  
142 quantitative meta-analysis to determine the effect of mobile applications in the  
143  
144 improvement of adherence to medication in cancer treatment.

143

### 144 **Materials and methods**

145 This protocol is registered with the International Prospective Register of  
146  
147 Systematic Reviews, registration number CRD42018102172. The Preferred  
148  
149 Reporting Items for Systematic Reviews and Meta-Analyses (PRISMA) (12)  
150  
151 statement guidelines were used to construct this systematic review protocol.  
152  
153 International Prospective Register of Systematic Reviews 2018:  
154  
155 CRD42018102172.

151

### 152 **Types of studies**

153 This review will include studies that fall in these criteria: (a) Clinical Trial,  
154  
155 Controlled Clinical Trial or Randomized Controlled Trial, (b) studies including  
156  
157 adult subjects (18 years of age); (c) studies published up to January 2018; (d)  
158  
159 studies including adherence to cancer treatment with oral medications and use  
160  
161 of mobile applications; (e) clinical trials evaluating the use of mobile applications  
162  
163 for adherence to oral treatment in cancer patients and (f) no language  
164  
165 restrictions.

160

### 161 **Types of patients**

161

162

163

164

165

166

1  
2  
3 162 Participants of the studies are adults (older than 18 years) diagnosed with  
4 cancer, using ongoing oral chemotherapy medications and using mobile  
5 163 applications to improve their adherence to medication.  
6  
7 164

8 165

### 10 166 **Types of interventions**

11 167 Parallel Randomized Controlled Trials (RCTs) that compare the use of the  
12 mobile application with a concurrent control group, which does not use the  
13 168 mobile application. Other interventions will not be evaluated, for example:  
14 patient education, Reminder Tools, Calendars, pillboxes, Electronic Reminders,  
15 169 etc. (9,10).  
16  
17 170  
18 171

19 172

### 22 173 **Types of outcome measures**

23 174 The primary outcome will be the improved adherence to medication in cancer  
24 treatment. The secondary outcome will be improvement in self-care, better life  
25 175 quality and control of signs and symptoms. Another outcome is the success of  
26 the therapy instituted by the physician and health team and economic benefits  
27 176 (reduction of exacerbation of the disease, crisis or relapse); in the assumption  
28 of social and professional roles (13). Consequences of non-adherence are not  
29 177 only an increase in consumption resources from the health system, such as the  
30 number of medical consultations and emergency consultations, more frequent  
31 178 hospitalizations with longer duration, but also an increase in treatment toxicity,  
32 bias in the evaluation of drug efficacy and an increase in mortality (4, 14-15).  
33 179  
34 180  
35 181  
36 182  
37 183  
38 184

39 185

### 43 186 **Search methods for identification of studies**

#### 44 187 **Electronic searches**

45 188 The databases MEDLINE, Embase, SciELO, Scopus and Cochrane Database  
46 of Systematic Reviews will be used to search for articles. No language  
47 189 restrictions will be used, no restrictions on publication period will be applied.  
48 The descriptor terms will be: (antineoplastic agents OR oral anticancer agents  
49 190 OR drug therapy) AND (mobile application OR mobile apps OR app OR  
50 smartphone OR health informatics OR mobile health) AND (medication  
51 191 adherence OR patient empowerment OR treatment adherence and  
52 compliance).  
53 192  
54 193  
55 194  
56 195



1  
2  
3 196 **Other sources**

4  
5 197 The scope of the computerized literature search will be enlarged on the basis of  
6  
7 198 the reference lists of retrieved articles.

8  
9 199 **Patient and Public Involvement**

10 200 The research will be performed by a wide and comprehensive search of  
11  
12 201 literature from data bases and the individual patient data are not included. Thus,  
13  
14 202 the authors no involved patients in setting there search question, as well as, the  
15  
16 203 outcome measures, the design and implementation of the study, and the  
17  
18 204 dissemination of its results.

19 205

20 206 **Search strategy**

21  
22 207 Table 1 presents the search strategy for Medline.

23  
24 **Table 1** Medline search strategy

25  
26 Search items

|    |    |                                    |
|----|----|------------------------------------|
| 27 | 1  | antineoplastic agents              |
| 28 | 2  | oral anticancer agents             |
| 29 | 3  | drug therapy                       |
| 30 | 4  | Or/1-3                             |
| 31 | 5  | mobile application                 |
| 32 | 6  | mobile apps                        |
| 33 | 7  | smartphone                         |
| 34 | 8  | health informatics                 |
| 35 | 9  | mobile health                      |
| 36 | 10 | Or/5-9                             |
| 37 | 11 | medication adherence               |
| 38 | 12 | patient participation              |
| 39 | 13 | patient compliance                 |
| 40 | 14 | treatment adherence and compliance |
| 41 | 15 | MedicationTherapy Management       |
| 42 | 16 | Or/11-15                           |
| 43 | 17 | 4 and 10 and 16                    |

44  
45  
46  
47  
48  
49  
50  
51  
52  
53  
54  
55  
56  
57 208

58  
59 209 **Data collection and analysis**

60

### 210 **Selection of studies and Search and selection of literature**

211 The articles published up to January 2018 were identified by a wide literature  
212 search of databases following the terms of the medical subject headings and/or  
213 text words: (antineoplastic agents OR oral anticancer agents OR drug therapy)  
214 AND (mobile application OR mobile apps OR app OR smartphone OR health  
215 informatics OR mobile health) AND (medication adherence OR patient  
216 empowerment). Moreover, the bibliographies of the reviewed articles were  
217 included. Three researchers (KSM, WAC, and JFQ) searched for articles  
218 published up to January 2018

219  
220 Study identification and selection is illustrated in the flow diagram in [Fig. 1](#). After  
221 searching the databases, potentially relevant papers will be identified and the  
222 others excluded after reviewing the title or after reviewing the abstract. Reviews  
223 will be made by KSM, WAC, and JFQ; disagreements will be solved by a fourth  
224 reviewer (AKSG). Thus, papers that meet the criteria will be reviewed in full.  
225 After the full review, papers that are considered to not have adequate  
226 methodological quality according to the GRADE guidelines will be excluded.  
227 Finally, repeated studies that are found (being present in two databases at the  
228 same time) will be excluded. Finally, papers will be approved for data extraction  
229 (Fig. 1).

230  
231 Insert **Figure 1**: Flow diagram of the search for eligible studies in the use of  
232 mobile applications for adherence to cancer treatment: CENTRAL, Cochrane  
233 Central Register of Controlled Trials.

### 235 **Data extraction and management**

236 Various study characteristics will be extracted from the original research and  
237 included in the systematic review. The data to be included are the first authors'  
238 last names, year of publication, location of the study (country), study design,  
239 primary objective, population, sample size, follow-up period, inclusion/exclusion  
240 criteria, type of App used, type of control used, and primary results.  
241 Standardized data extraction forms will specifically be created for this review  
242 and the results will be subsequently entered into a database. All data entry will  
243 be double-checked. Three blind reviewers (KSM, WAC, and JFQ) use the

1  
2  
3 244 inclusion criteria to choose available articles. Disagreements will be solved by  
4  
5 245 means of mutual consensus.  
6  
7 246

### 8 247 **Risk of bias assessment**

9  
10 248 Three review authors will independently assess the risk of bias in the included  
11  
12 249 studies using the Cochrane risk of bias tool. The modified Cochrane  
13  
14 250 Collaboration tool will be used to assess risk of bias for randomized controlled  
15  
16 251 trials. Bias is assessed as a judgment (high, low, or unclear) for individual  
17  
18 252 elements from five domains (selection, performance, attrition, reporting, and  
19  
20 253 other) (16).  
21

### 22 254 **Assessment of heterogeneity**

23  
24 255 The bias of publication will be mitigated with a comprehensive, sensitive,  
25  
26 256 unrestricted search for language and with an extensive search in the gray  
27  
28 257 literature.  
29

30  
31 258 The heterogeneity of the studies will be evaluated in the funnel plot.  
32  
33 259 Additionally, a quantitative synthesis will be used if the included studies are  
34  
35 260 sufficiently homogenous.

36  
37 261 As well as this, the heterogeneity between trial results will be evaluated using a  
38  
39 262 standard  $X^2$  test with a significance level of  $p < 0.1$ . To assess heterogeneity, we  
40  
41 263 plan to compute the  $I^2$  statistic, which is a quantitative measurement of  
42  
43 264 inconsistency across studies. A value of 0% indicates no observed  
44  
45 265 heterogeneity, whereas  $I^2$  values of  $\geq 50\%$  indicate a substantial level of  
46  
47 266 heterogeneity.  
48

### 49 267 **Analysis**

50  
51 268 Data will be entered in the Review Manager software (RevMan5.2). This  
52  
53 269 software allows the user to enter protocols, to complete reviews, include text,  
54  
55 270 characteristics of the studies, comparison tables and study data, and to perform  
56  
57 271 meta-analyses of the data that the Odds Ratios will obtain.  
58

### 59 272 **DISCUSSION**

60

1  
2  
3 277 The adherence to cancer treatment is a very common and relevant clinical  
4  
5 278 problem, with a significant adverse impact on the health system. In this review,  
6  
7 279 we aim to determine the effect of mobile applications in the improvement of  
8  
9 280 adherence to medication in cancer treatment. In theory, mobile applications can  
10  
11 281 improve adherence to cancer treatment, because it reminds the patient of the  
12  
13 282 time to take the medicine and assists in the management of care. Therefore,  
14  
15 283 mobile phone applications (apps), may support oncology patients with  
16  
17 284 medication and disease management (17). We expect that our review will  
18  
19 285 provide accurate data for effective strategies for adherence to cancer treatment.  
20  
21 286 Furthermore, this review will improve our understanding of adherence to cancer  
22  
23 287 treatment with mobile applications.

288

### 289 **Ethics and dissemination**

290 Ethical approval is not required because this systematic review will use  
291 published patient data. Findings of this systematic review will be published in a  
292 peer-reviewed journal and updates will be conducted if there is enough new  
293 evidence that may cause any change in the review conclusions.

294

### 295 **REFERENCES**

296

- 297 1. Weingart SN, Flug J, Brouillard D, et al. Oral  
298 chemotherapysafetypracticesat US cancer centres:  
299 questionnairesurvey. *BMJ*. 2007; 334:407-10.  
300
- 301 2. Wood L. A review onadherence management in patientson oral  
302 cancertherapies. *Eur J OncolNurs* 2012;16:432–8.  
303
- 304 3. Moody M, Jackowski J. Are patientson oral chemotherapy in yourpractice  
305 setting safe? *Clin J OncolNurs*. 2010, 14: 339-346.  
306
- 307 4. Chabrier M, Bezy O, Mouret MA, Bay JO, Jalenques I. Impact of  
308 depressive disorders on adherence to oral anti-cancer treatment. *Bulletin*  
309 *Du Cancer*. 2013; 10: 1017-1022.

310

1  
2  
3  
4  
5  
6  
7  
8  
9  
10  
11  
12  
13  
14  
15  
16  
17  
18  
19  
20  
21  
22  
23  
24  
25  
26  
27  
28  
29  
30  
31  
32  
33  
34  
35  
36  
37  
38  
39  
40  
41  
42  
43  
44  
45  
46  
47  
48  
49  
50  
51  
52  
53  
54  
55  
56  
57  
58  
59  
60

- 311 5. Burhenn, P.S.; Smudde, J. Using tools  
312 and technology to promote education and adherence to oral agents for  
313 cancer. *Clin. J. Oncol. Nurs.* 2015, 19, 53–59.  
314
- 315 6. MEDICINE, U.S. National Library Of MEDICINE. Medical Subject  
316 Headings: Mobile Applications. 2018. Disponível em:  
317 <<https://www.ncbi.nlm.nih.gov/mesh/68063731>>. Acesso em: 06 out.  
318 2018.  
319
- 320 7. Elliott M, Liu Y. The nine rights of medication administration: an overview.  
321 *Br J Nurs.* 2010;19(5):300-5.  
322
- 323 8. DiMatteo MR. Patient adherence to pharmacotherapy:  
324 the importance of effective communication. *Formulary.* 1995;30:596–8.  
325 601–2, 605.  
326
- 327 9. Makubi A, Sasi P, Ngajeje M, et al. Rationale and design of mDOT-  
328 HuA study: a randomized trial to assess the effect of mobile-  
329 directly observed therapy on adherence to hydroxyurea in  
330 adults with sickle cell anemia in Tanzania. *BMC Med Res Methodol.*  
331 2016;16(1):140.  
332
- 333 10. Thakkar J, Kurup R, Laba, T, et al. Mobile Telephone Text Messaging for  
334 Medication Adherence in Chronic Disease: A Meta-analysis. *JAMA*  
335 *Internal Medicine.* 2016;176(3):340-349.  
336
- 337 11. Barillet M, Prevost V, Joly F, Clarisse B. Oral antineoplastic agents: How  
338 do we care about adherence? *Br J Clin Pharmacol* 2015;80:1289-302.  
339
- 340 12. Moher D, Liberati A, Tetzlaff J, Altman DG, The PRISMA  
341 Group Preferred reporting items for systematic reviews and meta-analyses:  
342 The PRISMA Statement *PLoS Med*, 6 (2008), p. e1000097. doi:  
343 10.1371/journal.pmed.1000097  
344

- 1  
2  
3 345 13. Shimada CS. Adherence to treatment with oral medications. Rio de  
4 Janeiro: Elsevier, 2016.  
5 346  
6 347  
7  
8 348 14. Ruddy K, Mayer E, Partridge A. Patient adherence and persistence with oral  
9 anticancer treatment. *CA Cancer J Clin* 2009;59:56–66.  
10 349  
11 350  
12  
13 351 15. Jingjin, Grant ES, Vernon MS, Oh, Shuchuen li.  
14 Factors affecting therapeutic compliance: A review from the patient's  
15 perspective. *Ther Clin Risk Manag*. 2008; 4(1): 269-286.  
16 352  
17 353  
18 354  
19  
20 355 16. Higgins, PTJ, Altman, DG, Gotzsche, PC, Juni, P, Moher, D, Oxman, AD,  
21 et al. The Cochrane Collaboration's tool for assessing risk of bias in  
22 randomised trials. *BMJ*. 2011; 343, d5928.  
23 356  
24 357  
25 358  
26  
27 359 17. Jupp JCY, Sultani H, Cooper CA, Peterson KA, Truong TH. Evaluation of  
28 mobile phone application to support medication adherence and symptom  
29 management in oncology patients. *Pediatric Blood & Cancer*.  
30 360  
31 361  
32 362 2018;65(11):e27278.  
33 363

### 364 Acknowledgments

365 The author would now like to acknowledge the assistance provided by the Graduate Program in  
366 Health Sciences of Federal University of Rio Grande do Norte (UFRN) in the  
367 368  
369

370 **Contributors** KSM, BS and AKG contributed to the design of this review. KSM  
371 drafted the protocol manuscript, and AKG revised it. KSM, RNC and AKG  
372 developed the search strategies and KSD, JFQ and AS will implement them.  
373 KSM, AS, JFQ, and WAC will track potential studies, extract data and assess  
374 quality. In case of disagreement between the data extractors, AKG will advise  
375 on the methodology and will work as the referee. RNC will complete the data  
376 synthesis. All authors have approved the final version for publication.

377 **Funding** This research did not receive any specific grants from any funding  
378 agency in public, commercial or nonprofit sectors.

1  
2  
3  
4  
5  
6  
7  
8  
9  
10  
11  
12  
13  
14  
15  
16  
17  
18  
19  
20  
21  
22  
23  
24  
25  
26  
27  
28  
29  
30  
31  
32  
33  
34  
35  
36  
37  
38  
39  
40  
41  
42  
43  
44  
45  
46  
47  
48  
49  
50  
51  
52  
53  
54  
55  
56  
57  
58  
59  
60

379

380 **Competing interests** None declared.

For peer review only

1  
2  
3  
4  
5  
6  
7  
8  
9  
10  
11  
12  
13  
14  
15  
16  
17  
18  
19  
20  
21  
22  
23  
24  
25  
26  
27  
28  
29  
30  
31  
32  
33  
34  
35  
36  
37  
38  
39  
40  
41  
42  
43  
44  
45  
46  
47  
48  
49  
50  
51  
52  
53  
54  
55  
56  
57  
58  
59  
60

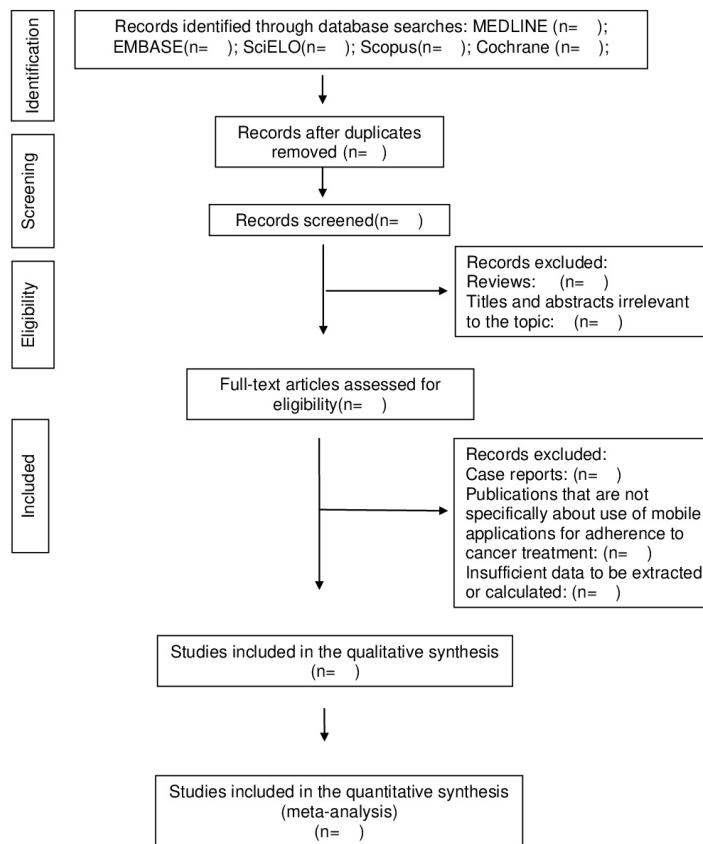

**Figure 1** Flow diagram of the search for eligible studies in the use of mobile applications for adherence to cancer treatment: CENTRAL, Cochrane Central Register of Controlled Trials.

419x594mm (72 x 72 DPI)



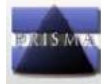

# PRISMA 2009 Checklist

1  
2  
3  
4  
5  
6  
7  
8  
9  
10  
11  
12  
13  
14  
15  
16  
17  
18  
19  
20  
21  
22  
23  
24  
25  
26  
27  
28  
29  
30  
31  
32  
33  
34  
35  
36  
37  
38  
39  
40  
41  
42  
43  
44  
45  
46  
47

| Section/topic                      | #  | Checklist item                                                                                                                                                                                                                                                                                              | Reported on page # |
|------------------------------------|----|-------------------------------------------------------------------------------------------------------------------------------------------------------------------------------------------------------------------------------------------------------------------------------------------------------------|--------------------|
| <b>TITLE</b>                       |    |                                                                                                                                                                                                                                                                                                             |                    |
| Title                              | 1  | Identify the report as a systematic review, meta-analysis, or both.                                                                                                                                                                                                                                         | X                  |
| <b>ABSTRACT</b>                    |    |                                                                                                                                                                                                                                                                                                             |                    |
| Structured summary                 | 2  | Provide a structured summary including, as applicable: background; objectives; data sources; study eligibility criteria, participants, and interventions; study appraisal and synthesis methods; results; limitations; conclusions and implications of key findings; systematic review registration number. | X                  |
| <b>INTRODUCTION</b>                |    |                                                                                                                                                                                                                                                                                                             |                    |
| Rationale                          | 3  | Describe the rationale for the review in the context of what is already known.                                                                                                                                                                                                                              | X                  |
| Objectives                         | 4  | Provide an explicit statement of questions being addressed with reference to participants, interventions, comparisons, outcomes, and study design (PICOS).                                                                                                                                                  | X                  |
| <b>METHODS</b>                     |    |                                                                                                                                                                                                                                                                                                             |                    |
| Protocol and registration          | 5  | Indicate if a review protocol exists, if and where it can be accessed (e.g., Web address), and, if available, provide registration information including registration number.                                                                                                                               | X                  |
| Eligibility criteria               | 6  | Specify study characteristics (e.g., PICOS, length of follow-up) and report characteristics (e.g., years considered, language, publication status) used as criteria for eligibility, giving rationale.                                                                                                      | X                  |
| Information sources                | 7  | Describe all information sources (e.g., databases with dates of coverage, contact with study authors to identify additional studies) in the search and date last searched.                                                                                                                                  | X                  |
| Search                             | 8  | Present full electronic search strategy for at least one database, including any limits used, such that it could be repeated.                                                                                                                                                                               | X                  |
| Study selection                    | 9  | State the process for selecting studies (i.e., screening, eligibility, included in systematic review, and, if applicable, included in the meta-analysis).                                                                                                                                                   | X                  |
| Data collection process            | 10 | Describe method of data extraction from reports (e.g., piloted forms, independently, in duplicate) and any processes for obtaining and confirming data from investigators.                                                                                                                                  | X                  |
| Data items                         | 11 | List and define all variables for which data were sought (e.g., PICOS, funding sources) and any assumptions and simplifications made.                                                                                                                                                                       | X                  |
| Risk of bias in individual studies | 12 | Describe methods used for assessing risk of bias of individual studies (including specification of whether this was done at the study or outcome level), and how this information is to be used in any data synthesis.                                                                                      | X                  |
| Summary measures                   | 13 | State the principal summary measures (e.g., risk ratio, difference in means).                                                                                                                                                                                                                               | X                  |
| Synthesis of results               | 14 | Describe the methods of handling data and combining results of studies, if done, including measures of consistency (e.g., I <sup>2</sup> ) for each meta-analysis.                                                                                                                                          |                    |

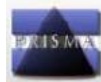

# PRISMA 2009 Checklist

Page 1 of 2

| Section/topic                 | #  | Checklist item                                                                                                                                                                                           | Reported on page # |
|-------------------------------|----|----------------------------------------------------------------------------------------------------------------------------------------------------------------------------------------------------------|--------------------|
| Risk of bias across studies   | 15 | Specify any assessment of risk of bias that may affect the cumulative evidence (e.g., publication bias, selective reporting within studies).                                                             | X                  |
| Additional analyses           | 16 | Describe methods of additional analyses (e.g., sensitivity or subgroup analyses, meta-regression), if done, indicating which were pre-specified.                                                         |                    |
| <b>RESULTS</b>                |    |                                                                                                                                                                                                          |                    |
| Study selection               | 17 | Give numbers of studies screened, assessed for eligibility, and included in the review, with reasons for exclusions at each stage, ideally with a flow diagram.                                          |                    |
| Study characteristics         | 18 | For each study, present characteristics for which data were extracted (e.g., study size, PICOS, follow-up period) and provide the citations.                                                             |                    |
| Risk of bias within studies   | 19 | Present data on risk of bias of each study and, if available, any outcome level assessment (see item 12).                                                                                                |                    |
| Results of individual studies | 20 | For all outcomes considered (benefits or harms), present, for each study: (a) simple summary data for each intervention group (b) effect estimates and confidence intervals, ideally with a forest plot. |                    |
| Synthesis of results          | 21 | Present results of each meta-analysis done, including confidence intervals and measures of consistency.                                                                                                  |                    |
| Risk of bias across studies   | 22 | Present results of any assessment of risk of bias across studies (see Item 15).                                                                                                                          |                    |
| Additional analysis           | 23 | Give results of additional analyses, if done (e.g., sensitivity or subgroup analyses, meta-regression [see Item 16]).                                                                                    |                    |
| <b>DISCUSSION</b>             |    |                                                                                                                                                                                                          |                    |
| Summary of evidence           | 24 | Summarize the main findings including the strength of evidence for each main outcome; consider their relevance to key groups (e.g., healthcare providers, users, and policy makers).                     | X                  |
| Limitations                   | 25 | Discuss limitations at study and outcome level (e.g., risk of bias), and at review-level (e.g., incomplete retrieval of identified research, reporting bias).                                            | X                  |
| Conclusions                   | 26 | Provide a general interpretation of the results in the context of other evidence, and implications for future research.                                                                                  |                    |
| <b>FUNDING</b>                |    |                                                                                                                                                                                                          |                    |
| Funding                       | 27 | Describe sources of funding for the systematic review and other support (e.g., supply of data); role of funders for the systematic review.                                                               | X                  |

From: Moher D, Liberati A, Tetzlaff J, Altman DG, The PRISMA Group (2009). Preferred Reporting Items for Systematic Reviews and Meta-Analyses: The PRISMA Statement. PLoS Med 6(7): e1000097. doi:10.1371/journal.pmed1000097

For more information, visit: [www.prisma-statement.org](http://www.prisma-statement.org).

Page 2 of 2

For peer review only - <http://bmjopen.bmj.com/site/about/guidelines.xhtml>

# BMJ Open

## The Impact of Mobile Applications on Adherence to Cancer Treatment: a Systematic Review Protocol

|                                 |                                                                                                                                                                                                                                                                                                                                                                                                                                                                                                                                                           |
|---------------------------------|-----------------------------------------------------------------------------------------------------------------------------------------------------------------------------------------------------------------------------------------------------------------------------------------------------------------------------------------------------------------------------------------------------------------------------------------------------------------------------------------------------------------------------------------------------------|
| Journal:                        | <i>BMJ Open</i>                                                                                                                                                                                                                                                                                                                                                                                                                                                                                                                                           |
| Manuscript ID                   | bmjopen-2018-027246.R1                                                                                                                                                                                                                                                                                                                                                                                                                                                                                                                                    |
| Article Type:                   | Protocol                                                                                                                                                                                                                                                                                                                                                                                                                                                                                                                                                  |
| Date Submitted by the Author:   | 02-Apr-2019                                                                                                                                                                                                                                                                                                                                                                                                                                                                                                                                               |
| Complete List of Authors:       | Medeiros, Kleyton ; Universidade Federal do Rio Grande do Norte<br>Queiroz, Janice; Universidade Federal do Rio Grande do Norte Centro de Ciencias da Saude<br>Sarmiento, Ayane Cristine ; Universidade Federal do Rio Grande do Norte<br>Costa, Weruska; Universidade Federal do Rio Grande do Norte Centro de Ciencias da Saude<br>Cobucci, Ricardo; Universidade Potiguar Unidade Salgado Filho<br>Stransky, Beatriz; Universidade Federal do Rio Grande do Norte Centro de Tecnologia<br>Gonçalves, Ana ; Universidade Federal do Rio Grande do Norte |
| <b>Primary Subject Heading</b>: | Oncology                                                                                                                                                                                                                                                                                                                                                                                                                                                                                                                                                  |
| Secondary Subject Heading:      | Communication, Nursing                                                                                                                                                                                                                                                                                                                                                                                                                                                                                                                                    |
| Keywords:                       | mobile application, medication adherence, oral anticancer agents, Health informatics < BIOTECHNOLOGY & BIOINFORMATICS, patient compliance                                                                                                                                                                                                                                                                                                                                                                                                                 |
|                                 |                                                                                                                                                                                                                                                                                                                                                                                                                                                                                                                                                           |

SCHOLARONE™  
Manuscripts

1  
2  
3 **1 The Impact of Mobile Applications on Adherence to Cancer Treatment: a**  
4 **2 Systematic Review Protocol**  
5  
6  
7  
8

9 4 Kleyton Santos de Medeiros<sup>1</sup>, Janice França Queiroz<sup>1</sup>, Ayane Cristine Alves  
10 5 Sarmiento<sup>1</sup>, Weruska Alcoforado Costa<sup>1</sup>, Ricardo Ney Cobucci<sup>2</sup>, Beatriz  
11 6 Stransky<sup>3</sup>, Ana Katherine Goncalves<sup>1,2</sup>  
12  
13  
14

15 8 <sup>1</sup>Postgraduate Program in Health Sciences, Federal University of Rio Grande do  
16 9 Norte, Natal, Brazil.  
17  
18

19 10 <sup>2</sup>Department of Gynecology and Obstetrics, Potiguar University, UnP Natal,  
20 11 Brazil.  
21  
22

23 12 <sup>3</sup>Department of Gynecology and Obstetrics, Federal University of Rio Grande  
24 13 do Norte, Natal, Brazil.  
25  
26

27 14 <sup>4</sup>Department of Biomedical engineering, Federal University of Rio Grande do  
28 15 Norte, Natal, Brazil.  
29  
30  
31

32 16  
33 17 \*Corresponding author:

34 18 Ana Katherine Gonçalves

35 19 E-mail address: anakatherine\_ufrnet@yahoo.com.br  
36  
37  
38  
39  
40  
41  
42  
43  
44  
45

46 21 Conflict of Interest statement: None  
47  
48  
49  
50  
51  
52  
53  
54  
55  
56  
57  
58  
59  
60

## 28 **ABSTRACT**

### 29 **Introduction**

30 The number of patients taking oral chemotherapy is Increasing around the  
31 world; this is essential to maximize adherence to oral chemotherapy to improve  
32 overall survival and life expectancy. This review aims to evaluate the  
33 effectiveness of mobile applications in the improvement of adherence to oral  
34 chemotherapy and adjuvant hormonal therapy among cancer survivors.

### 35 **Methods and analysis**

36 The databases MEDLINE, Embase, SciELO, Scopus and Cochrane Database  
37 of Systematic Reviews will be used to search for articles from January 2018.  
38 Clinical Trials, Controlled Clinical Trials, Randomized Controlled Trials using  
39 mobile applications among cancer survivors to aid adherence to oral  
40 chemotherapy and adjuvant hormonal therapy. Other interventions such as:  
41 patient education, Reminder Tools, Calendars, pillboxes, Electronic Reminders,  
42 etc will not be evaluated. The primary outcome will be better Adherence and/or  
43 persistence with therapy. The secondary outcome will be safety/toxicity, clinical  
44 disease related outcomes, health care utilization, and patient engagement with  
45 some promising signs of improvement. Three independent reviewers will select  
46 trials and extract data from the original publications. The risk of bias will be  
47 assessed according to the Cochrane Risk of Bias tool. Data synthesis will be  
48 performed using the Review Manager software (RevMan V.5.2.3). To assess  
49 heterogeneity, we will compute the I<sup>2</sup> statistic. The heterogeneity of the studies  
50 will be evaluated in the funnel plot. Additionally, a quantitative synthesis will be  
51 used if the included studies are sufficiently homogenous.

### 52 **Ethics and dissemination**

53 This study will be a review of the published data, and thus it is not necessary to  
54 obtain ethical approval. Findings of this systematic review will be published in a  
55 peer-reviewed journal.

56 **Trial registration number:** International Prospective Register of Systematic  
57 Reviews 2018:CRD42018102172.

58  
59  
60  
61

## 62 **STRENGTHS AND LIMITATIONS OF THIS STUDY**

63 - This review/meta-analysis aims to combine the results of different studies that  
64 have comparable effect sizes that can be computed.

65 - Three reviewers will independently select the eligibility trials to be included in  
66 this review, extract data without different variables and assess the risk of bias.

67 - However, it may be that we will only get a small sample size and a limited  
68 number of studies, which may influence the validity and reliability of the findings.

69 - Additionally, different types of mobile app may cause considerable  
70 heterogeneity that might be deficient in generating convincing conclusions.

71 - Despite these limitations, the results obtained from this systematic review will  
72 propose which strategy is most useful for the improvement of adherence to oral  
73 chemotherapeutic treatment, choosing between the mobile app and other  
74 approaches.

## 76 **INTRODUCTION**

### 77 **Description of the condition**

78 About 25% of new antineoplastic agents in development are estimated to be  
79 oral drugs, and the number of available oral chemotherapy medications is  
80 expected to more than double over the next few years (1-3). Oral therapy is  
81 often preferred by patients to IV therapy for several reasons. The benefits of  
82 oral agents for cancer are: patient preference, convenience of use, easier  
83 administration and more convenience for patients because they result in fewer  
84 office visits and less time spent receiving treatment compared to IV  
85 chemotherapy (4,5). Additionally, oral therapy can provide a feeling of control  
86 over treatment, decrease treatment interference with work and social activities,  
87 eliminating the travel time needed to go to an infusion clinic, and eliminate the  
88 discomfort of having an IV line inserted for each administration (2). Once an  
89 antineoplastic agent is ordered, the administration is the responsibility of the  
90 patient (5). However, the problem of non-adherence to treatment and  
91 pharmacological limitations are still poorly studied (3).

### 93 **Description of the intervention**

94 Oncology nurses can use tools and technology to assist with education, which  
95 may promote adherence with the suggestion of reminder tools that can be used.

1  
2  
3 96 Many have already been developed: patient education; physical devices such  
4 97 as pillboxes and glowing pill bottles; or computer and mobile applications (apps)  
5 98 to work as electronic reminders, such as calendars, text messaging, and  
6 99 alarms (5). This article aims to verify if the use of mobile applications improves  
7  
8  
9  
10 the patient in adherence to medication in cancer treatment.  
11

101

### 102 **Intervention mechanisms**

103 Mobile applications are computer programs or software installed on mobile  
104 electronic devices which support a wide range of functions and uses which  
105 include television, telephone, video, music, word processing, and Internet  
106 service (6). Based on the researchers' analysis of available apps, medication  
107 reminder apps were first developed in 2009 (5). For the purpose of this study,  
108 the mobile application will replicate (or show, inform) the medical and nursing  
109 orientations for use of oral chemotherapy drugs at home, i.e., how to take, the  
110 principle reactions, and principle interactions. Additionally, they will remind the  
111 patient to take the medication at the right time and right dose as prescribed (7).  
112

112

113 In the treatment of chronic diseases, adherence to treatment remain a  
114 complicated issue. (8-10). In these situations, It is recognized the benefit of  
115 interventions, even if it is a simple intervention (text message). (10). These  
116 interferences increase medication adherence, with a doubling of the odds of  
117 patients' achieving adherence to their medication regimens. The latter increase  
118 adherence rates from 50% to 67.8%.  
119

119

120 The advantages of mobile applications over other interventions are simplicity  
121 and ease of administration, often in an automated fashion using a computerized  
122 program.  
123

123

124 Mobile applications may be useful for promoting healthy behaviors and  
125 lifestyles, monitor, track, collect and transmit data in real time, facilitating the  
126 doctor-patient communication, increasing the level of sharing and cooperation  
127 between the patient and health professionals.  
128

128

1  
2  
3 129 Several techniques may increase adherence to treatment. The most effective  
4 130 interventions include behavioral approaches; however, there is no consensus  
5 131 on which behavioral techniques (e.g., specific goal-setting, self-monitoring, and  
6 132 social comparison) are central to effective medication adherence interventions.  
7  
8  
9

10 133

### 11 134 **Why it is important to perform this review**

12 135 Traditional interventions to improve adherence are complex and not widely  
13 136 useful. All interventions effective for long-term care were involved and not  
14 137 widely useful. There is a widespread need for convenient and feasible  
15 138 innovations to help patients remain adherent to medications (10).  
16  
17  
18  
19

20 139

21  
22 140 Presently, the average rate of non-adherence to oral anti-cancer therapy is  
23 141 estimated to be around 21% (4); that is, poor adherence is a barrier to  
24 142 completing the treatment (9,10). Non-adherence is complex and systemic, as  
25 143 well as this, at home there is no professional oversight to know whether patients  
26 144 are correctly taking the medication as prescribed. Oral regimens may come with  
27 145 complicated dosing schedules or various foods and drug interactions that make  
28 146 adherence difficult. In busy clinics, patients may be given written materials  
29 147 about the new medication, but little time may be available for one-on-one  
30 148 interaction (5). Ensuring patient adherence to a treatment that involves self-  
31 149 administration is a challenge that is faced by health care providers (2,11). Many  
32 150 factors can affect the treatment adherence: lack of understanding regarding  
33 151 proper administration, complex dosing regimens, administration of other  
34 152 potentially interacting medications, the timing of treatment doses concerning  
35 153 food intake, cost of the drug, and unpleasant side effects. Furthermore,  
36 154 common health conditions of the patients such as visual and cognitive  
37 155 impairment, memory deficits or forgetfulness can pose other difficulties (2).  
38  
39  
40  
41  
42  
43  
44  
45  
46  
47  
48  
49

50 156

51 157 Poor adherence has been linked to successive hospitalizations, increased need  
52 158 for medical interventions, morbidity, and mortality. Besides, medication non-  
53 159 adherence results increased health care cost, with estimates from North  
54 160 America of approximately \$100 billion being spent annually and \$2000 spent  
55 161 per patient per year in excess physician visits (10).  
56  
57  
58  
59  
60

162



1  
2  
3 163 In this context, it is necessary to verify if the use of mobile applications can help  
4 the patient to overcome those difficulties and improve the adherence to  
5 164 treatment. Despite the increased use of oral chemotherapy, the number of  
6 165 studies addressing the issue of adherence remains surprisingly low (11).  
7  
8 166  
9 167

## 11 168 **Objectives**

12  
13 169 This review/metanalysis aims to evaluate the effectiveness of mobile  
14 applications in the improvement of adherence to oral chemotherapy and  
15 170 adjuvant hormonal therapy among cancer survivors.  
16  
17 171  
18 172

## 19 173 **Materials and methods**

20  
21 174 This protocol is registered with the International Prospective Register of  
22 Systematic Reviews, registration number CRD42018102172. The Preferred  
23 175 Reporting Items for Systematic Reviews and Meta-Analyses (PRISMA) (12)  
24 176 statement guidelines were used to construct this systematic review protocol.  
25  
26 177 International Prospective Register of Systematic Reviews 2018:  
27 178 CRD42018102172.  
28  
29 179  
30 180  
31 181

## 32 182 **Types of studies**

33  
34 183 This review will include studies that fall in these criteria: (a) Clinical Trial,  
35 Controlled Clinical Trial or Randomized Controlled Trial, (b) studies including  
36 184 adult subjects (18 years of age); (c) studies published up to July2019; (d)  
37 185 studies including adherence to cancer treatment with oral medications and use  
38 186 of mobile applications; (e) clinical trials evaluating the use of mobile applications  
39 187 for adherence to oral chemotherapy and adjuvant hormonal therapy among  
40 188 cancer survivors (f) no language restrictions.  
41  
42 189  
43 190

## 44 191 **The PICO strategy**

- 45  
46 192 • Population/Participants: Patients on oncological treatment with oral  
47 193 chemotherapy and adjuvant hormonal therapy among cancer survivors  
48  
49 194 • Intervention: Use of mobile application  
50  
51 195 • Comparator/control: Do not use mobile application  
52  
53 196 • Outcome: Improvement adherence to medication in cancer treatment.  
54  
55  
56  
57  
58  
59  
60

## 197 **Types of patients**

198 Participants of the studies are adults (older than 18 years) diagnosed with  
199 cancer, using ongoing oral chemotherapy and adjuvant hormonal therapy, using  
200 mobile applications to improve their adherence to medication.

## 202 **Types of interventions**

203 Parallel Randomized Controlled Trials (RCTs) that compare the use of the  
204 mobile application with a concurrent control group, which does not use the  
205 mobile application. Other interventions will not be evaluated, for example:  
206 patient education, Reminder Tools, Calendars, pillboxes, Electronic Reminders,  
207 etc (9,10).

## 209 **Types of outcome measures**

210 Various methods of adherence were reported in the literature including self-  
211 report, medication measurement, patient report/survey, Morisky-green Test, pill  
212 count, electronic cap monitoring, and pharmacy fill data or combinations of  
213 methods. Each method has advantages and limits, and a gold standard still  
214 does not exist. (8).

216 The primary outcome will be the improved adherence to medication in cancer  
217 treatment. (8). The secondary outcomes will be an improvement in overall  
218 survival and life expectancy, improved quality of life and control of signs and  
219 symptoms. Patients risk improper dosing and an increase in disease recurrence  
220 when there is nonadherence with medications; then the safety/toxicity profile  
221 was the secondary outcome. (8).

223 Another outcome will be the success of the therapy instituted by the physician  
224 and health team and economic benefits (reduction of exacerbation of the  
225 disease, crisis or relapse); in the assumption of social and professional roles  
226 (13).

228 Consequences of non-adherence are not only an increase in consumption  
229 resources from the health system, such as the number of medical consultations  
230 and emergency consultations, more frequent hospitalizations with longer

231 duration but also an increase in treatment toxicity, bias in the evaluation of drug  
232 efficacy and an increase in mortality (4, 14-15).

233

## 234 **Search methods for identification of studies**

### 235 **Electronic searches**

236 The databases MEDLINE, Embase, SciELO, Scopus and Cochrane Database  
237 of Systematic Reviews will be used to search for articles. No language  
238 restrictions will be used, no restrictions on publication period will be applied.  
239 The descriptor terms will be: (antineoplastic agents OR oral anticancer agents  
240 OR drug therapy) AND (mobile application OR mobile apps OR app OR  
241 smartphone OR health informatics OR mobile health) AND (medication  
242 adherence OR patient empowerment OR treatment adherence and  
243 compliance).

244

### 245 **Other sources**

246 The scope of the computerized literature search will be enlarged on the basis of  
247 the reference lists of retrieved articles.

248

### 249 **Patient and Public Involvement**

250 The research will be performed by a wide and comprehensive search of  
251 literature from data bases and the individual patient data are not included. Thus,  
252 the authors no involved patients in setting there search question, as well as, the  
253 outcome measures, the design and implementation of the study, and the  
254 dissemination of its results.

255

### 256 **Search strategy**

257 Table 1 presents the search strategy for Medline.

**Table 1** Medline search strategy

#### Search items

|          |                        |
|----------|------------------------|
| <b>1</b> | antineoplastic agents  |
| <b>2</b> | oral anticancer agents |
| <b>3</b> | drug therapy           |
| <b>4</b> | Or/1-3                 |

|    |                                    |
|----|------------------------------------|
| 5  | mobile application                 |
| 6  | mobile apps                        |
| 7  | Smartphone                         |
| 8  | health informatics                 |
| 9  | mobile health                      |
| 10 | Or/5-9                             |
| 11 | medication adherence               |
| 12 | patient participation              |
| 13 | patient compliance                 |
| 14 | treatment adherence and compliance |
| 15 | MedicationTherapy Management       |
| 16 | Or/11-15                           |
| 17 | 4 and 10 and 16                    |

258

## 259 **Data collection and analysis**

### 260 **Selection of studies and Search and selection of literature**

261 The articles published up to July 2019 will be identified by a wide literature  
 262 search of databases following the terms of the medical subject headings and/or  
 263 text words: (antineoplastic agents OR oral anticancer agents OR drug therapy)  
 264 AND (mobile application OR mobile apps OR app OR smartphone OR health  
 265 informatics OR mobile health) AND (medication adherence OR patient  
 266 empowerment). Moreover, the bibliographies of the reviewed articles were  
 267 included. Three researchers (KSM, WAC, and JFQ) searched for articles  
 268 published up to January 2018

269

270 Study identification and selection is illustrated in the flow diagram in [Fig. 1](#). After  
 271 searching the databases, potentially relevant papers will be identified and the  
 272 others excluded after reviewing the title or after reviewing the abstract. Reviews  
 273 will be made by KSM, WAC, and JFQ; disagreements will be solved by a fourth  
 274 reviewer (AKSG). Thus, papers that meet the criteria will be reviewed in full.  
 275 After the full review, papers that are considered to not have adequate  
 276 methodological quality according to the GRADE guidelines will be excluded.  
 277 Finally, repeated studies that are found (being present in two databases at the

1  
2  
3 278 same time) will be excluded. Finally, papers will be approved for data extraction  
4  
5 279 (Fig. 1).  
6  
7 280

8 281 Insert **Figure 1**: Flow diagram of the search for eligible studies in the use of  
9  
10 282 mobile applications for adherence to cancer treatment: CENTRAL, Cochrane  
11  
12 283 Central Register of Controlled Trials.  
13  
14 284

### 15 285 **Data extraction and management**

16 286 Various study characteristics will be extracted from the original research and  
17  
18 287 included in the systematic review. The data to be included are the first authors'  
19  
20 288 last names, year of publication, location of the study (country), study design,  
21  
22 289 primary objective, population, sample size, follow-up period, inclusion/exclusion  
23  
24 290 criteria, type of App used, type of control used, and primary results.  
25  
26 291 Standardized data extraction forms will specifically be created for this review  
27  
28 292 and the results will be subsequently entered into a database. All data entry will  
29  
30 293 be double-checked. Three blind reviewers (KSM, WAC, and JFQ) use the  
31  
32 294 inclusion criteria to choose available articles. Disagreements will be solved by  
33  
34 295 means of mutual consensus.  
35  
36 296

### 37 297 **Risk of bias assessment**

38 298 Three review authors will independently assess the risk of bias in the included  
39  
40 299 studies using the Cochrane risk of bias tool. The modified Cochrane  
41  
42 300 Collaboration tool will be used to assess risk of bias for randomized controlled  
43  
44 301 trials. Bias is assessed as a judgment (high, low, or unclear) for individual  
45  
46 302 elements from five domains (selection, performance, attrition, reporting, and  
47  
48 303 other) (16).  
49  
50 304

### 51 305 **Assessment of heterogeneity**

52 306 The bias of publication will be mitigated with a comprehensive, sensitive,  
53  
54 307 unrestricted search for language and with an extensive search in the gray  
55  
56 308 literature.  
57  
58 309

59 310 The high heterogeneity predicted among the selected articles will occur due to  
60 311 the great diversity of protocols for the treatment of cancer and the variety of

1  
2  
3 312 available mobile applications. The factors that will be compared are better  
4  
5 313 Adherence and persistence with therapy, safety/toxicity, clinical disease-related  
6  
7 314 outcomes, health care utilization, and patient engagement with some promising  
8  
9 315 signs of improvement.

10 316

11 317 The heterogeneity of the studies will be evaluated in the funnel plot.  
12  
13 318 Additionally, a quantitative synthesis will be used if the included studies are  
14  
15 319 sufficiently homogenous.

16 320

17  
18 321 As well as this, the heterogeneity between trial results will be evaluated using a  
19  
20 322 standard  $X^2$  test with a significance level of  $p < 0.1$ . To assess heterogeneity, we  
21  
22 323 plan to compute the  $I^2$  statistic, which is a quantitative measurement of  
23  
24 324 inconsistency across studies. A value of 0% indicates no observed  
25  
26 325 heterogeneity, whereas  $I^2$  values of  $\geq 50\%$  indicate a substantial level of  
27  
28 326 heterogeneity.

29 327

### 30 328 **Analysis**

31  
32 329 Data will be entered in the Review Manager software (RevMan5.2). This  
33  
34 330 software allows the user to enter protocols, to complete reviews, include text,  
35  
36 331 characteristics of the studies, comparison tables and study data, and to perform  
37  
38 332 meta-analyses of the data that the Odds Ratios will obtain.

39 333

### 40 334 **DISCUSSION**

41  
42 335 The adherence to cancer treatment is a very common and relevant clinical  
43  
44 336 problem, with a significant adverse impact on the health system. In this review,  
45  
46 337 we aim to determine the effect of mobile applications in the improvement of  
47  
48 338 adherence to medication in cancer treatment. In theory, mobile applications can  
49  
50 339 improve adherence to cancer treatment, because it reminds the patient of the  
51  
52 340 time to take the medicine and assists in the management of care. Therefore,  
53  
54 341 mobile phone applications (apps), may support oncology patients with  
55  
56 342 medication and disease management (17,18). We expect that our review will  
57  
58 343 provide accurate data for effective strategies for adherence to cancer treatment.  
59  
60 344 Furthermore, this review will improve our understanding of adherence to cancer  
345 treatment with mobile applications.

1  
2  
3 346  
4  
5 347  
6  
7 348  
8  
9 349  
10 350  
11  
12 351  
13  
14 352  
15 353  
16  
17 354  
18  
19 355  
20  
21 356  
22  
23 357  
24 358  
25 359  
26 360  
27 361  
28 362  
29 363  
30 364  
31 365  
32 366  
33 367  
34 368  
35 369  
36 370  
37 371  
38 372  
39 373  
40 374  
41 375  
42 376  
43 377  
44 378  
45 379

### **Ethics and dissemination**

Ethical approval is not required because this systematic review will use published patient data. Findings of this systematic review will be published in a peer-reviewed journal and updates will be conducted if there is enough new evidence that may cause any change in the review conclusions.

### **Acknowledgments**

The author would now like to acknowledge the assistance provided by the Graduate Program in Health Sciences of Federal University of Rio Grande do Norte (UFRN) in the conduction of literary research.

**Contributors** KSM, BS and AKG contributed to the design of this review. KSM drafted the protocol manuscript, and AKG revised it. KSM, RNC and AKG developed the search strategies and KSD, JFQ and AS will implement them. KSM, AS, JFQ, and WAC will track potential studies, extract data and assess quality. In case of disagreement between the data extractors, AKG will advise on the methodology and will work as the referee. RNC will complete the data synthesis. All authors have approved the final version for publication.

**Funding** This research did not receive any specific grants from any funding agency in public, commercial or nonprofit sectors.

**Competing interests:** None declared.

380 **REFERENCES**

- 381 1. Weingart SN, Flug J, Brouillard D, et al. Oral  
382 chemotherapy safety practices at US cancer centers: questionnaire  
383 survey. *BMJ*. 2007; 334:407-10.
- 384 2. Wood L. A review on adherence management in patients on oral  
385 cancer therapies. *Eur J Oncol Nurs* 2012;16:432–8.
- 386 3. Moody M, Jackowski J. Are patients on oral chemotherapy in your practice  
387 setting safe? *Clin J Oncol Nurs*. 2010, 14: 339-346.
- 388 4. Chabrier M, Bezy O, Mouret MA, Bay JO, Jalenques I. Impact of  
389 depressive disorders on adherence to oral anti-cancer treatment. *Bulletin*  
390 *Du Cancer*. 2013; 10: 1017-1022.
- 391 5. Burhenn, P.S.; Smudde, J. Using tools and technology to promote  
392 education and adherence to oral agents for cancer. *Clin. J. Oncol. Nurs*.  
393 2015, 19, 53–59.
- 394 6. MEDICINE, U.S. National Library Of MEDICINE. Medical Subject  
395 Headings: Mobile Applications. 2018. Evaluable in:  
396 <<https://www.ncbi.nlm.nih.gov/mesh/68063731>>. Accessed in: March 16.  
397 2019.
- 398 7. Elliott M, Liu Y. The nine rights of medication administration: an overview.  
399 *Br J Nurs*. 2010;19(5):300-5
- 400 8. Zerillo JA, Goldenberg BA, Kotecha RR, Tewari AK, Jacobson JO,  
401 Krzyzanowska MK Interventions to Improve Oral Chemotherapy Safety  
402 and Quality: A Systematic Review. *JAMA Oncol*. 2018 Jan 1;4(1):105-117.  
403 doi: 10.1001/jamaoncol.2017.0625.
- 404 9. Makubi A, Sasi P, Ngaeje M, et al. Rationale and design of mDOT-  
405 HuA study: a randomized trial to assess the effect of mobile-directly  
406 observed therapy on adherence to hydroxyurea in adults with sickle cell  
407 anemia in Tanzania. *BMC Med Res Methodol*. 2016;16(1):140.
- 408 10. Thakkar J, Kurup R, Laba, T, et al. Mobile Telephone Text Messaging for  
409 Medication Adherence in Chronic Disease: A Meta-analysis. *JAMA*  
410 *Internal Medicine*. 2016;176(3):340-349.
- 411 11. Barillet M, Prevost V, Joly F, Clarisse B. Oral antineoplastic agents: How  
412 do we care about adherence? *Br J Clin Pharmacol* 2015;80:1289-302.



- 1  
2  
3 413 12. Moher D, Liberati A, Tetzlaff J, Altman DG, The PRISMA  
4 Group Preferred reporting items for systematic reviews and meta-analyses:  
5 414 The PRISMA Statement PLoS Med, 6 (2008), p. e1000097. doi:  
6 415 10.1371/journal.pmed.1000097  
7  
8 416  
9  
10 417 13. Shimada CS. Adherence to treatment with oral medications. Rio de  
11 Janeiro: Elsevier, 2016.  
12 418  
13 419 14. Ruddy K, Mayer E, Partridge A. Patient adherence and persistence with oral  
14 anticancer treatment. CA Cancer J Clin 2009;59:56–66.  
15 420  
16  
17 421 15. Jingjin, Grant ES, Vernon MS Oh, Shuchuen li. Factor affecting the  
18 therapeutic compliance: A review from the patient's perspective. Ther Clin  
19 422 Risk Manag. 2008; 4(1): 269-286.  
20 423  
21  
22 424 16. Higgins, PTJ, Altman, DG, Gotzsche, PC, Juni, P, Moher, D, Oxman, AD,  
23 et al. The Cochrane Collaboration's tool for assessing risk of bias in  
24 425 randomized trials. BMJ. 2011; 343, d5928.  
25 426  
26  
27 427 17. Jupp JCY, Sultani H, Cooper CA, Peterson KA, Truong TH. Evaluation of  
28 428 mobile phone applications to support medication adherence and symptom  
29 management in oncology patients. Pediatric Blood & Cancer.  
30 429 2018;65(11):e27278.  
31 430  
32  
33 431 18. Carmody JK, Denson LA, Hommel KA. Content and Usability Evaluation of  
34 Medication Adherence Mobile Applications for Use in Pediatrics. J Pediatr  
35 432 Psychol. 2019 Apr 1;44(3):333-342.  
36 433  
37  
38  
39  
40  
41  
42  
43  
44  
45  
46  
47  
48  
49  
50  
51  
52  
53  
54  
55  
56  
57  
58  
59  
60

1  
2  
3  
4  
5  
6  
7  
8  
9  
10  
11  
12  
13  
14  
15  
16  
17  
18  
19  
20  
21  
22  
23  
24  
25  
26  
27  
28  
29  
30  
31  
32  
33  
34  
35  
36  
37  
38  
39  
40  
41  
42  
43  
44  
45  
46  
47  
48  
49  
50  
51  
52  
53  
54  
55  
56  
57  
58  
59  
60

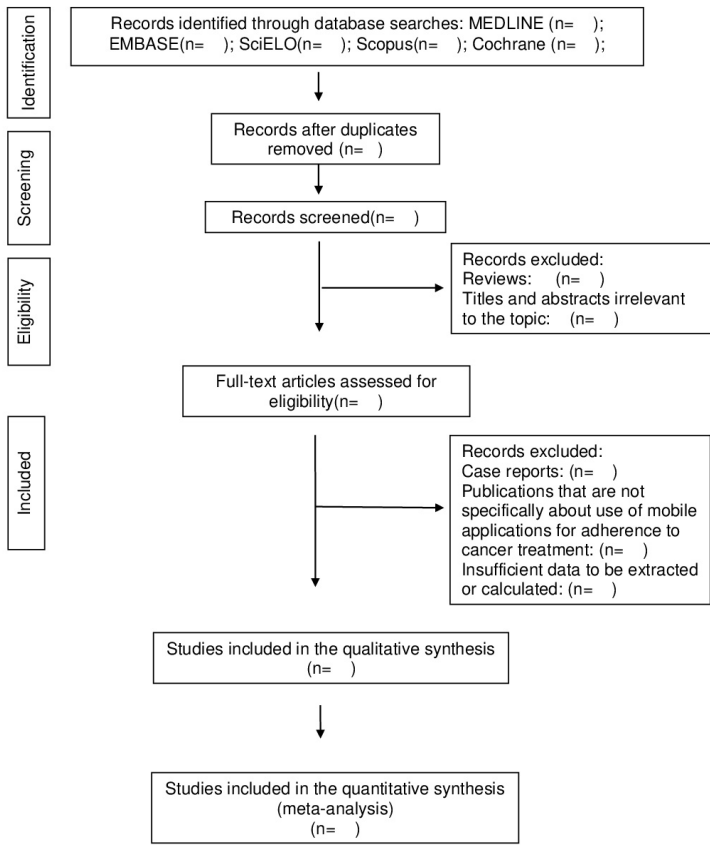

**Figure 1** Flow diagram of the search for eligible studies in the use of mobile applications for adherence to cancer treatment: CENTRAL, Cochrane Central Register of Controlled Trials.

419x594mm (72 x 72 DPI)

# BMJ Open

## The Impact of Mobile Applications on Adherence to Cancer Treatment: a Systematic Review and Meta-analysis Protocol

|                                 |                                                                                                                                                                                                                                                                                                                                                                                                                                                                                                                                             |
|---------------------------------|---------------------------------------------------------------------------------------------------------------------------------------------------------------------------------------------------------------------------------------------------------------------------------------------------------------------------------------------------------------------------------------------------------------------------------------------------------------------------------------------------------------------------------------------|
| Journal:                        | <i>BMJ Open</i>                                                                                                                                                                                                                                                                                                                                                                                                                                                                                                                             |
| Manuscript ID                   | bmjopen-2018-027246.R2                                                                                                                                                                                                                                                                                                                                                                                                                                                                                                                      |
| Article Type:                   | Protocol                                                                                                                                                                                                                                                                                                                                                                                                                                                                                                                                    |
| Date Submitted by the Author:   | 19-Jul-2019                                                                                                                                                                                                                                                                                                                                                                                                                                                                                                                                 |
| Complete List of Authors:       | Medeiros, Kleyton ; Universidade Federal do Rio Grande do Norte Queiroz, Janice; Universidade Federal do Rio Grande do Norte Centro de Ciencias da Saude<br>Monteiro, Michelly; Universidade Federal do Rio Grande do Norte Costa, Weruska; Universidade Federal do Rio Grande do Norte Centro de Ciencias da Saude<br>Cobucci, Ricardo; Universidade Potiguar Unidade Salgado Filho<br>Stransky, Beatriz; Universidade Federal do Rio Grande do Norte Centro de Tecnologia<br>Gonçalves, Ana ; Universidade Federal do Rio Grande do Norte |
| <b>Primary Subject Heading</b>: | Oncology                                                                                                                                                                                                                                                                                                                                                                                                                                                                                                                                    |
| Secondary Subject Heading:      | Communication, Nursing                                                                                                                                                                                                                                                                                                                                                                                                                                                                                                                      |
| Keywords:                       | mobile application, medication adherence, oral anticancer agents, Health informatics < BIOTECHNOLOGY & BIOINFORMATICS, patient compliance                                                                                                                                                                                                                                                                                                                                                                                                   |
|                                 |                                                                                                                                                                                                                                                                                                                                                                                                                                                                                                                                             |

SCHOLARONE™  
Manuscripts

1  
2  
3 **The Impact of Mobile Applications on Adherence to Cancer Treatment: a**  
4 **Systematic Review and Meta-analysis Protocol**  
5  
6  
7

8 Kleyton Santos de Medeiros<sup>1</sup>, Janice França Queiroz<sup>1</sup>, Michelly Nóbrega  
9 Monteiro<sup>1</sup>, Weruska Alcoforado Costa<sup>1</sup>, Ricardo Ney Cobucci<sup>2</sup>, Beatriz  
10 Stransky<sup>3</sup>, Ana Katherine Goncalves<sup>1,2</sup>  
11  
12  
13  
14

15 <sup>1</sup>Postgraduate Program in Health Sciences, Federal University of Rio Grande  
16 do Norte, Natal, Brazil.  
17

18 <sup>2</sup>Postgraduate Program in Biotechnology, Potiguar University, UnP Natal,  
19 Brazil.  
20  
21

22 <sup>3</sup>Department of Gynecology and Obstetrics, Federal University of Rio Grande  
23 do Norte, Natal, Brazil.  
24

25 <sup>4</sup>Department of Biomedical engineering, Federal University of Rio Grande do  
26 Norte, Natal, Brazil.  
27  
28  
29

30 \*Corresponding author:

31 Ana Katherine Gonçalves

32 E-mail address: anakatherine\_ufrnet@yahoo.com.br  
33  
34  
35  
36  
37

38 Conflict of Interest statement: None  
39  
40  
41  
42  
43  
44  
45  
46  
47  
48  
49  
50  
51  
52  
53  
54  
55  
56  
57  
58  
59  
60

## ABSTRACT

### Introduction

The number of patients taking oral chemotherapy is increasing around the world. It is essential to maximize adherence to oral chemotherapy to improve overall survival and life expectancy. This systematic review aims to evaluate the effectiveness of mobile applications in the improvement of adherence to oral chemotherapy and adjuvant hormonal therapy among cancer survivors.

### Methods and analysis

The databases MEDLINE, Embase, LILACS, clinicaltrials.gov, Scopus and Cochrane Central Register of Controlled Trials will be used to search for any studies where there was randomization or quasi-experimental designs using mobile applications among cancer survivors to aid adherence to oral chemotherapy and adjuvant hormonal therapy from 2009 to July 2019. Other interventions such as: patient education, reminder tools, calendars, pillboxes and electronic reminders will not be evaluated. The primary outcome will be the improved adherence to medication in cancer treatment. The secondary outcomes will be an improvement in overall survival and life expectancy, improved quality of life and control of symptoms related to cancer. Three independent reviewers will select trials and extract data from the original publications. The risk of bias will be assessed according to the Cochrane Risk of Bias tool. Data synthesis will be performed using the Review Manager software (RevMan V.5.2.3). To assess heterogeneity, we will compute the  $I^2$  statistic. Additionally, a quantitative synthesis will be used if the included studies are sufficiently homogenous.

### Ethics and dissemination

This study will be a review of the published data, and thus it is not necessary to obtain ethical approval. Findings of this systematic review will be published in a peer-reviewed journal.

**Trial registration number:** International Prospective Register of Systematic Reviews 2018: CRD42018102172.

## STRENGTHS AND LIMITATIONS OF THIS STUDY

- This systematic review/meta-analysis aims to combine the results of different studies that have comparable effect sizes that can be computed.
- Three reviewers will independently select the eligibility trials to be included in this review, extract data without different variables and assess the risk of bias.
- However, it may be that we will only get a small sample size and a limited number of studies, which may influence the validity and reliability of the findings.
- Additionally, different types of mobile app may cause considerable heterogeneity that could be deficient in generating convincing conclusions.
- Despite these limitations, the results obtained from this systematic review and meta-analysis will propose which strategy is most useful for the improvement of adherence to oral chemotherapeutic treatment, choosing between the mobile app and other approaches.

## INTRODUCTION

### Description of the condition

About 25% of new antineoplastic agents in development are estimated to be oral drugs, and the number of available oral chemotherapy medications is expected to more than double over the next few years (1-3). Patients often prefer oral therapy to IV therapy for several reasons. The benefits of oral agents for cancer are: patient preference, convenience of use, easier administration and more convenience for patients because they result in fewer office visits and less time is spent receiving treatment compared to IV chemotherapy (4,5). Additionally, oral therapy can provide a feeling of control over treatment, decrease treatment interference with work and social activities, eliminating the travel time needed to go to an infusion clinic, and eliminate the discomfort of having an IV line inserted for each administration (2). Once an antineoplastic agent is ordered, the administration is the responsibility of the patient (5). Yet patients and clinicians face new challenges in managing adherence to these oral therapies (6).

Although, a substantial proportion of patients struggle to adhere to these medications as prescribed. No reliable estimate of adherence to oral antineoplastic therapies can be obtained from the literature, due to the fact that

1  
2  
3 the few intervention studies for adherence that there are have notable  
4 methodological concerns, thereby limiting the evidence to guide the practice in  
5 promoting medication adherence among patients with cancer (6). Thus, the  
6 problem of non-adherence to treatment and pharmacological limitations are still  
7 poorly studied (3).  
8  
9  
10  
11  
12

13 Hershman et al. found that interventions to enhance the psychosocial well-being  
14 of patients should be evaluated to increase adherence. Furthermore, he  
15 explains in his study that adherence to therapy has been reported to be  
16 associated with belief in the efficacy of the medication and with belief in the  
17 benefits of taking prescribed medications more generally; and high levels of  
18 cancer-specific emotional distress were associated with subsequent non-  
19 persistence in treatment (7).  
20  
21  
22  
23  
24  
25  
26

27 Another important finding is that the perception of poor physician–patient  
28 communication, negative beliefs regarding efficacy of the medication and fear of  
29 toxicities are associated with failure to initiate the therapy (6).  
30  
31  
32  
33

34 In a systematic review, Greer et al. (6) assessed interventions to improve  
35 adherence to oral antineoplastic therapies for patients with various  
36 malignancies. Interventions varied in format, and included educational support,  
37 treatment monitoring, pharmacy-based programs, counseling programs,  
38 prefilled pill boxes, and automated voice response systems. Nevertheless, most  
39 of these suffered high risk of bias due to nonrandomized designs, small sample  
40 sizes, subjective assessments of adherence, and missing data concerns. In  
41 another systematic review of interventions to promote adherence to oral  
42 antineoplastic therapies that has been published to date, the investigators drew  
43 similar conclusions (8).  
44  
45  
46  
47  
48  
49  
50  
51  
52

53 Moreover, a variety of educational, symptom management and reminder- based  
54 interventions, which involve delivery mechanisms such as face-to-face  
55 interactions, phone calls and SMS texting have been developed and tested.  
56 However, the evidence on the effectiveness of the interventions is not yet  
57 conclusive (9-11).  
58  
59  
60

## Description of the intervention

The American Society of Clinical Oncology/Oncology Nursing Society recommend patient education in the oral chemotherapy administration (12).

Patient education includes:

- The storage, handling, preparation, administration, and disposal of oral chemotherapy;
- Concurrent cancer treatment and supportive care medications/measures (when applicable);
- Possible drug/drug and drug/food interactions;
- The plan for missed doses (12).

In this context, oncology nurses can use tools and technology to assist with education, which may promote adherence with the suggestion of reminder tools that can be used. Many have already been developed: patient education; physical devices such as pillboxes and glowing pill bottles; or computer and mobile applications (apps) to work as electronic reminders, such as calendars, text messaging, and alarms (5, 13-14).

In this sense, there are mobile applications that are computer programs or software installed on mobile electronic devices which support a wide range of functions and uses, which include television, telephone, video, music, word processing, and internet service (15). The first medication reminder apps were developed in 2009 (5,6).

The advantages of mobile applications (MA) over other interventions are simplicity and ease of administration, often in an automated fashion using a computerized program (6). Thus, MA may be useful for promoting healthy behaviors and lifestyles while monitoring, tracking, collecting and transmitting data in real time, facilitating the doctor-patient communication, and increasing the level of sharing and cooperation between the patient and health professionals (7).



1  
2  
3 Several techniques may increase adherence to treatment. However, most  
4 effective interventions include behavioral approaches and there is no  
5 consensus on which behavioral techniques (e.g., specific goal setting, self-  
6 monitoring, and social comparison) are central to effective medication  
7 adherence interventions (7).  
8  
9  
10  
11  
12

13 With the ever-growing presence of smartphones and the potential for efficacious  
14 behavioral intervention technology, scientists may implement momentary  
15 interventions and momentary assessments in order to collect data in real-time in  
16 real and convenient real-world situations. Along with this, researchers are thus  
17 able to optimize the delivery of behavioral interventions and collect ongoing  
18 data with minimal burden to the patient and provider (11).  
19  
20  
21  
22  
23

24 A recent review indicates that adopting mobile technologies to deliver  
25 accessible interventions can improve health behaviors in patients with cancer  
26 (13).  
27  
28  
29  
30

31 Therefore, this protocol aims to verify if the use of mobile applications improves  
32 the patient adherence to medication in cancer treatment.  
33  
34  
35

### 36 **Intervention mechanisms**

37 In the treatment of chronic diseases, drug adherence remains a complicated  
38 issue. (8-14,16-18). In these situations, the benefits of using technology as an  
39 enabling factor are recognized, even if it is a simple text message (19). This  
40 may improve adherence to the prescribed dosage, with an increase in  
41 adherence rates ranging from 50% to 67.8% (14).  
42  
43  
44  
45  
46  
47

48 Apps are suitable for delivering various educational and behavioral interventions  
49 while enabling caregivers and health professionals to monitor patients'  
50 medication consumption patterns (10).  
51  
52  
53  
54

### 55 **Why it is important to perform this review**

56 Traditional interventions to improve adherence and that are effective for long-  
57 term care are complex and not widely used. There is a widespread need for  
58  
59  
60

1  
2  
3 convenient and feasible innovations to help patients remain adherent to  
4 medications (18).  
5  
6  
7

8 Presently, the average rate of non-adherence to oral anti-cancer therapy is  
9 estimated to be around 21% (4), demonstrating that poor adherence is a barrier  
10 to completing the treatment (18,19). Non-adherence is complex and systemic,  
11 as well as this, while at home there is no professional oversight to know  
12 whether patients are correctly taking the medication as prescribed. Oral  
13 regimens may come with complicated dosing schedules or various foods and  
14 drug interactions that make adherence difficult. In busy clinics, patients may be  
15 given written materials about the new medication, but little time may be  
16 available for one-on-one interaction (5). Ensuring patient adherence to a  
17 treatment that involves self-administration is a challenge that is faced by health  
18 care providers (2,20). Many factors can affect the treatment adherence: lack of  
19 understanding regarding proper administration, complex dosing regimens,  
20 administration of other potentially interacting medications, the timing of  
21 treatment doses concerning food intake, cost of the drug, and unpleasant side  
22 effects. Furthermore, common health conditions of the patients such as visual  
23 and cognitive impairment, memory deficits or forgetfulness can pose other  
24 difficulties (2).  
25  
26  
27  
28  
29  
30  
31  
32  
33  
34  
35  
36  
37  
38

39 Poor adherence has been linked to successive hospitalizations, increased need  
40 for medical interventions, morbidity, and mortality. As well as this, medication  
41 non-adherence results in increased health care costs, with North America  
42 having estimates of approximately \$100 billion being spent annually and \$2000  
43 spent per patient per year in excess physician visits (19).  
44  
45  
46  
47  
48

49 In this context, it is necessary to verify if the use of mobile applications can help  
50 the patient to overcome those difficulties and improve the adherence to  
51 treatment. Despite the increased use of oral chemotherapy, the number of  
52 studies addressing the issue of adherence remains surprisingly low (20).  
53  
54  
55  
56  
57

## 58 **Objectives**

59  
60

1  
2  
3 This systematic review and meta-analysis protocol aims to evaluate the  
4 effectiveness of mobile applications in the improvement of adherence to oral  
5 chemotherapy and adjuvant hormonal therapy among cancer survivors.  
6  
7  
8  
9

## 10 **Materials and methods**

11 This protocol is registered with the International Prospective Register of  
12 Systematic Reviews, registration number CRD42018102172. The Preferred  
13 Reporting Items for Systematic Reviews and Meta-Analyses (PRISMA) (21)  
14 statement guidelines were used to construct this systematic review protocol.  
15 The number for the International Prospective Register of Systematic Reviews  
16 2018: CRD42018102172.  
17  
18  
19  
20  
21  
22  
23

## 24 **Types of studies**

25 This systematic review will include studies that fall into these criteria: studies  
26 where there was randomization or with quasi-experimental designs; that include  
27 adult subjects (above 18 years of age); that evaluate the use of mobile  
28 applications for adherence to oral chemotherapy and adjuvant hormonal  
29 therapy among cancer survivors; and no language restrictions.  
30  
31  
32  
33  
34  
35

## 36 **The PICO strategy**

- 37 • Population/Participants: Patients undergoing oncological treatment with oral  
38 chemotherapy or adjuvant hormonal therapy
- 39 • Intervention: Use of mobile application
- 40 • Comparator/control: Non-use of mobile application
- 41 • Outcome: Improvement adherence to medication in cancer treatment.  
42  
43  
44  
45  
46  
47

## 48 **Types of patients**

49 Participants of the studies are adults (older than 18 years) diagnosed with  
50 cancer, ongoing oral chemotherapy or adjuvant hormonal therapy and using  
51 mobile applications to improve their adherence to medication.  
52  
53  
54  
55  
56

## 57 **Types of interventions**

58 Studies that compare the use of the mobile application with a concurrent control  
59 group to evaluate adherence.  
60

## Types of outcome measures

As a consequence of the absence of the correct intake of doses of oral medication by the cancer patient, there may be additional treatment costs due to the increased frequency of hospitalization and return to medical appointments, reappearance of symptoms, and consequent increase in drug toxicity due to overdosage (to make up for the missed dose) (4, 22-25).

The primary outcome will be the improved adherence to medication in cancer treatment (17). The secondary outcomes will be an improvement in overall survival and life expectancy, improved quality of life and control of symptoms related to cancer (9-11).

## Search methods for identification of studies

### Electronic searches

The Cochrane Central Register of Controlled Trials in The Cochrane Library, clinicaltrials.gov, Medline, LILACS, Scopus and Embase will be used to search for articles dated from 2009 to July 2019. No language restrictions will be used. The MESH terms will be: (antineoplastic agents OR oral anticancer agents OR drug therapy) AND (mobile application OR mobile apps OR app OR smartphone OR health informatics OR mobile health) AND (medication adherence OR patient empowerment OR treatment adherence and compliance).

### Other sources

The scope of the computerized literature search may be enlarged based on the reference lists of retrieved articles.

## Search strategy

Table 1 presents the search strategy for Medline.

---

**Table 1 Medline search strategy**

---

### Search items

|   |                       |
|---|-----------------------|
| 1 | antineoplastic agents |
|---|-----------------------|

---

|    |                                    |
|----|------------------------------------|
| 2  | oral anticancer agents             |
| 3  | drug therapy                       |
| 4  | Or/1-3                             |
| 5  | mobile application                 |
| 6  | mobile apps                        |
| 7  | Smartphone                         |
| 8  | health informatics                 |
| 9  | mobile health                      |
| 10 | Or/5-9                             |
| 11 | medication adherence               |
| 12 | patient participation              |
| 13 | patient compliance                 |
| 14 | treatment adherence and compliance |
| 15 | MedicationTherapy Management       |
| 16 | Or/11-15                           |
| 17 | 4 and 10 and 16                    |

## Data collection and analysis

### Selection of studies

Three authors, KSM, WAC, and JFQ, will independently screen the search results using titles and abstracts. Duplicates and reviews will be removed from the database. Two reviewers, KSM and MNM will then go through the full text to determine whether they meet the inclusion criteria. Discrepancies will be resolved by a third reviewer, AKG. The selection of the studies is summarized in a PRISMA flow diagram (figure 1).

Insert **Figure 1**: PRISMA flow diagram.

### Data extraction and management

Various study characteristics will be extracted from the original research and included in the systematic review and meta-analysis. The data to be included are the first authors' last names, year of publication, location of the study (country), study design, primary objective, population, sample size, follow-up

1  
2  
3 period, inclusion/exclusion criteria, type of MA used, type of control used, and  
4 primary results. Standardized data extraction forms will specifically be created  
5 for this review and the results will be subsequently entered into a database. All  
6 data entries will be double-checked.  
7  
8  
9

### 10 11 **Addressing missing data**

12 We will attempt to obtain any missing data by contacting the first or  
13 corresponding authors or coauthors of an article via phone, email or post. If we  
14 fail to receive any necessary information, the data will be excluded from our  
15 analysis and will be addressed in the discussion section.  
16  
17  
18  
19

### 20 21 **Risk of bias assessment**

22 Three review authors, KSM, JFQ and BS, will independently assess the risk of  
23 bias in the included studies using the Cochrane risk of bias tool (25). The  
24 modified Cochrane Collaboration tool will be used to assess risk of bias. Bias is  
25 assessed as a judgment (high, low, or unclear) for individual elements from five  
26 domains (selection, performance, attrition, reporting, and other).  
27  
28  
29  
30  
31  
32

### 33 34 **Assessment of heterogeneity**

35 The heterogeneity between trial results will be evaluated using a standard  $X^2$   
36 test with a significance level of  $p < 0.1$ . To assess heterogeneity, we plan to  
37 compute the  $I^2$  statistic, which is a quantitative measurement of inconsistency  
38 across studies. A value of 0% indicates no observed heterogeneity, whereas  $I^2$   
39 values of  $\geq 50\%$  indicate a substantial level of heterogeneity; however, the  
40 assessment of heterogeneity will only occur if it is appropriate to undertake a  
41 meta-analysis.  
42  
43  
44  
45  
46  
47  
48

### 49 50 **Analysis**

51 Data will be entered in the Review Manager software (RevMan5.2.3). This  
52 software allows the user to enter protocols, to complete reviews, include text,  
53 characteristics of the studies, comparison tables and study data, and to perform  
54 meta-analyses of the data. For dichotomous outcomes, we will extract or  
55 calculate the odds ratio (OR) and 95% confidence interval (CI) for each study.  
56 Where there is heterogeneity ( $I^2 \geq 50\%$ ), a random-effect model will be used to  
57  
58  
59  
60

1  
2  
3 combine the trials to calculate the OR and 95% CI, using the DerSimonian-Laird  
4 algorithm in The Meta for Package, a meta-analysis package for R software.  
5  
6  
7

8 Other study characteristics and results will be summarized narratively, if the  
9 meta-analysis cannot be performed for all or some of the included studies.  
10  
11 Sensitivity analyses will be important to explore the robustness of the findings  
12 regarding the study quality and sample size, and this is only possible to  
13 consider if a meta-analysis is undertaken. This will be shown in a summary  
14 table.  
15  
16  
17  
18  
19

### 20 **Confidence in cumulative evidence**

21  
22 To describe the strength of evidence for included data, we will use the Grading  
23 of Recommendation Assessment, Development and Evaluation (GRADE)  
24 approach to incorporate summary assessments into broader measurements to  
25 ensure the judgments about bias risk, consistency, directness, precision and  
26 publication bias (26).  
27  
28  
29  
30  
31

### 32 **Patient and Public Involvement**

33  
34 The research will be performed using a wide and comprehensive search of  
35 literature from databases and the individual patient data will not be included.  
36 Ethical approval is not required because this systematic review will use  
37 published patient data.  
38  
39  
40  
41

## 42 **DISCUSSION**

43  
44 The adherence to cancer treatment is a very common and relevant clinical  
45 problem, with a significant adverse impact on the health system. In this review,  
46 we aim to determine the effect of mobile applications in the improvement of  
47 adherence to medication in cancer treatment. In theory, MA can improve  
48 adherence to cancer treatment, because they can remind the patient of the time  
49 to take the medicine and assist in the management of care. Therefore, MA may  
50 support oncology patients with medication and disease management (27, 28).  
51 We expect that our review will provide accurate data for effective strategies for  
52 adherence to cancer treatment. Furthermore, this review will improve our  
53 understanding of adherence to cancer treatment with mobile applications.  
54  
55  
56  
57  
58  
59  
60

## Data sharing

Findings of this systematic review will be published in a peer-reviewed journal and updates will be conducted if there is enough new evidence that may cause any change in the review conclusions.

## Acknowledgments

The authors acknowledge the assistance provided by the Graduate Program in Health Sciences of the Federal University of Rio Grande do Norte (UFRN) in the undertaking of literary research.

## Contributors

KM, BS and AG contributed to the design of this review. KM drafted the protocol manuscript, and AG revised it. KM, RC and AG developed the search strategies and KM, JQ and MM will implement them. KM, MM, JQ, and WC will track potential studies, extract data and assess quality. In case of disagreement between the data extractors, AG will advise on the methodology and will work as the referee. RC will complete the data synthesis. All authors have approved the final version for publication.

## Funding

The authors have not declared a specific grant for this research from any funding agency in the public, commercial or not-for-profit sectors.

## Competing interests

None declared.

## Patient consent for publication

Not required.



## REFERENCES

1. Weingart SN, Flug J, Brouillard D, Morway L, Partridge A, Bartel S, Shulman LN, Connor M. Oral chemotherapy safety practices at US cancer centers: questionnaire survey. *BMJ*. 2007 Feb 24;334(7590):407.
2. Wood L. A review on adherence management in patients on oral cancer therapies. *Eur J Oncol Nurs*. 2012 Sep;16(4):432-8.
3. Moody M, Jackowski J. Are patients on oral chemotherapy in your practice setting safe? *Clin J Oncol Nurs*. 2010 Jun;14(3):339-46.
4. Chabrier M, Bezy O, Mouret MA, Bay JO, Jalenques I. Impact of depressive disorders on adherence to oral anti-cancer treatment. *Bull Cancer*. 2013 Oct;100(10):1017-22.
5. Burhenn, P.S.; Smudde, J. Using tools and technology to promote education and adherence to oral agents for cancer. *Clin J Oncol Nurs*. 2015 Jun;19(3 Suppl):53-9.
6. Greer JA, Amoyal N, Nisotel L, Fishbein JN, MacDonald J, Stagl J, Lennes I, Temel JS, Safren SA, Pirl WF. A Systematic Review of Adherence to Oral Antineoplastic Therapies. *Oncologist*. 2016 Mar;21(3):354-76.
7. Hershman DL, Kushi LH, Hillyer GC, Coromilas E, Buono D, Lamerato L, Bovbjerg DH, Mandelblatt JS, Tsai WY, Zhong X, Jacobson JS, Wright JD, Neugut AI. Psychosocial factors related to non-persistence with adjuvant endocrine therapy among women with breast cancer: the Breast Cancer Quality of Care Study (BQUAL). *Breast Cancer Res Treat*. 2016 May;157(1):133-43.
8. Mathes T, Antoine SL, Pieper D, Eikermann M. Adherence enhancing interventions for oral anticancer agents: a systematic review. *Cancer Treat Rev*. 2014 Feb;40(1):102-8.
9. Ali EE, Chan SSL, Leow JL, Chew L, Yap KY. User acceptance of an app-based adherence intervention: Perspectives from patients taking oral anticancer medications. *J Oncol Pharm Pract*. 2019 Mar;25(2):390-397.
10. Ali EE, Chan SSL, Poh HY, Susanto YA, Suganya T, Leow JL, Pang CK, Chew L, Yap KY. Design Considerations in the Development of App-Based Oral Anticancer Medication Management Systems: a Qualitative Evaluation of Pharmacists' and Patients' Perspectives. *J Med Syst*. 2019 Feb 6;43(3):63.

- 1  
2  
3 11. Fishbein JN, Nisotel LE, MacDonald JJ, Amoyal Pensak N, Jacobs JM,  
4 Flanagan C, Jethwani K, Greer JA. Mobile Application to Promote  
5 Adherence to Oral Chemotherapy and Symptom Management: A Protocol  
6 for Design and Development. *JMIR Res Protoc*. 2017 Apr 20;6(4):e62.  
7  
8  
9
- 10 12. Neuss MN, Polovich M, McNiff K, Esper P, Gilmore TR, LeFebvre KB,  
11 Schulmeister L, Jacobson JO. 2013 updated American Society of Clinical  
12 Oncology/Oncology Nursing Society chemotherapy administration safety  
13 standards including standards for the safe administration and  
14 management of oral chemotherapy. *J Oncol Pract*. 2013 Mar;9(2  
15 Suppl):5s-13s.  
16  
17  
18  
19
- 20 13. Darlow S, Wen K. Development testing of mobile health interventions for  
21 cancer patient self-management: A review. *Health Informatics J*. 2015 Apr  
22 27:1-18.  
23  
24
- 25 14. Jacobs JM, Pensak NA, Sporn NJ, MacDonald JJ, Lennes IT, Safren SA,  
26 Pirl WF, Temel JS, Greer JA. Treatment Satisfaction and Adherence to  
27 Oral Chemotherapy in Patients With Cancer. *J Oncol Pract*. 2017  
28 May;13(5):e474-e485.  
29  
30  
31
- 32 15. MEDICINE, U.S. National Library Of MEDICINE. Medical Subject  
33 Headings: Mobile Applications. 2018. Evaluable in:  
34 <<https://www.ncbi.nlm.nih.gov/mesh/68063731>>. Accessed in: March 16.  
35 2019.  
36  
37  
38
- 39 16. Elliott M, Liu Y. The nine rights of medication administration: an overview.  
40 *Br J Nurs*. 2010 Mar 11-24;19(5):300-5.  
41  
42
- 43 17. Zerillo JA, Goldenberg BA, Kotecha RR, Tewari AK, Jacobson JO,  
44 Krzyzanowska MK Interventions to Improve Oral Chemotherapy Safety  
45 and Quality: A Systematic Review. *JAMA Oncol*. 2018 Jan 1;4(1):105-117.  
46  
47
- 48 18. Makubi A, Sasi P, Ngaeje M, et al. Rationale and design ofmDOT-  
49 HuAstudy: a randomized trial to assess the effect of mobile-directly  
50 observed therapy on adherence to hydroxyurea in adults with sickle cell  
51 anemia in Tanzania. *BMC Med Res Methodol*. 2016 Oct 18;16(1):140.  
52  
53  
54
- 55 19. Thakkar J, Kurup R, Laba, T, et al. Mobile Telephone Text Messaging for  
56 Medication Adherence in Chronic Disease: A Meta-analysis. *JAMA Intern  
57 Med*. 2016 Mar;176(3):340-9.  
58  
59  
60

- 1  
2  
3 20. Barillet M, Prevost V, Joly F, Clarisse B. Oral antineoplastic agents: How  
4 do we care about adherence? *Br J Clin Pharmacol*. 2015 Dec;80(6):1289-  
5 302.  
6  
7
- 8 21. Moher D, Liberati A, Tetzlaff J, Altman DG, PRISMA Group. Preferred  
9 reporting items for systematic reviews and meta-analyses: The PRISMA  
10 Statement *PLoS Med*. 2009 Jul 21;6(7):e1000097.  
11  
12
- 13 22. Shimada CS. Adherence to treatment with oral medications. Rio de  
14 Janeiro: Elsevier, 2016.  
15
- 16 23. Ruddy K, Mayer E, Partridge A. Patient adherence and persistence with  
17 oral anticancer treatment. *CA Cancer J Clin*. 2009 Jan-Feb;59(1):56-66.  
18
- 19 24. Jingjin, Grant ES, Vernon MS Oh, Shuchuen li S. Factor affecting  
20 therapeutic compliance: A review from the patient's perspective. *Ther Clin*  
21 *Risk Manag*. 2008 Feb;4(1):269-86.  
22
- 23 25. Higgins JP, Altman DG, Gøtzsche PC, Jüni P, Moher D, Oxman AD,  
24 Savovic J, Schulz KF, Weeks L, Sterne JA. The Cochrane Collaboration's  
25 tool for assessing risk of bias in randomised trials. *Cochrane Bias Methods*  
26 *Group; Cochrane Statistical Methods Group*. *BMJ*. 2011 Oct18;343:d5928.  
27
- 28 26. Balshem H, Helfand M, Schünemann HJ, Oxman AD, Kunz R, Brozek J,  
29 Vist GE, Falck-Ytter Y, Meerpohl J, Norris S, Guyatt GH. GRADE  
30 guidelines: 3. Rating the quality of evidence. *J Clin Epidemiol*. 2011  
31 Apr;64(4):401-6.  
32
- 33 27. Jupp JCY<sup>1,2</sup>, Sultani H<sup>3</sup>, Cooper CA<sup>4</sup>, Peterson KA<sup>5</sup>, Truong TH<sup>1,6</sup>.  
34 Evaluation of mobile phone applications to support medication adherence  
35 and symptom management in oncology patients. *Pediatr Blood Cancer*.  
36 2018 Nov;65(11):e27278.  
37
- 38 28. Carmody JK, Denson LA, Hommel KA. Content and Usability Evaluation of  
39 Medication Adherence Mobile Applications for Use in Pediatrics. *J Pediatr*  
40 *Psychol*. 2019 Apr 1;44(3):333-342.  
41  
42  
43  
44  
45  
46  
47  
48  
49  
50  
51  
52  
53  
54  
55  
56  
57  
58  
59  
60

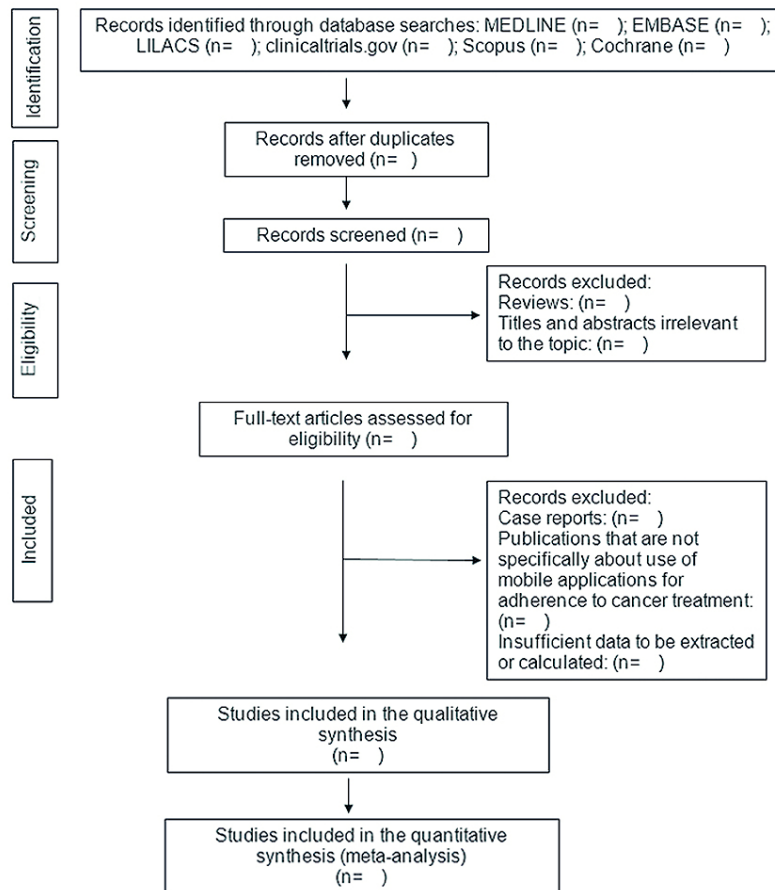

36 Figure 1 Flow diagram of the search for eligible studies in the use of mobile applications for adherence to cancer treatment: CENTRAL, Cochrane Central Register of Controlled Trials.

37  
38  
39  
40 Figure 1 Flow diagram of the search for eligible studies in the use of mobile applications for adherence to cancer treatment: CENTRAL, Cochrane Central Register of Controlled Trials.

41  
42  
43 90x90mm (300 x 300 DPI)

## Additional File 1. PRISMA Checklist

An Editorial from the Editors-in-Chief of *Systematic Reviews* details why this checklist was adapted - Moher D, Stewart L & Shekelle P: Implementing PRISMA-P: recommendations for prospective authors. *Systematic Reviews* 2016;5:15

| Section/topic                     | #  | Checklist item                                                                                                                                                                                  | Information reported |    | Line number(s) |
|-----------------------------------|----|-------------------------------------------------------------------------------------------------------------------------------------------------------------------------------------------------|----------------------|----|----------------|
|                                   |    |                                                                                                                                                                                                 | Yes                  | No |                |
| <b>ADMINISTRATIVE INFORMATION</b> |    |                                                                                                                                                                                                 |                      |    |                |
| <b>Title</b>                      |    |                                                                                                                                                                                                 |                      |    |                |
| Identification                    | 1a | Identify the report as a protocol of a systematic review                                                                                                                                        | √                    |    | 2              |
| Update                            | 1b | If the protocol is for an update of a previous systematic review, identify as such                                                                                                              |                      | √  | N/A            |
| <b>Registration</b>               | 2  | If registered, provide the name of the registry (e.g., PROSPERO) and registration number in the Abstract                                                                                        | √                    |    | 64             |
| <b>Authors</b>                    |    |                                                                                                                                                                                                 |                      |    |                |
| Contact                           | 3a | Provide name, institutional affiliation, and e-mail address of all protocol authors; provide physical mailing address of corresponding author                                                   | √                    |    | 4-21           |
| Contributions                     | 3b | Describe contributions of protocol authors and identify the guarantor of the review                                                                                                             | √                    |    | 397-404        |
| <b>Amendments</b>                 | 4  | If the protocol represents an amendment of a previously completed or published protocol, identify as such and list changes; otherwise, state plan for documenting important protocol amendments |                      | √  | N/A            |
| <b>Support</b>                    |    |                                                                                                                                                                                                 |                      |    |                |
| Sources                           | 5a | Indicate sources of financial or other support for the review                                                                                                                                   | √                    |    | 406-409        |
| Sponsor                           | 5b | Provide name for the review funder and/or sponsor                                                                                                                                               |                      | √  | N/A            |
| Role of sponsor/funder            | 5c | Describe roles of funder(s), sponsor(s), and/or institution(s), if any, in developing the protocol                                                                                              |                      | √  | N/A            |
| <b>INTRODUCTION</b>               |    |                                                                                                                                                                                                 |                      |    |                |
| <b>Rationale</b>                  | 6  | Describe the rationale for the review in the context of what is already known                                                                                                                   | √                    |    | 200-233        |
| <b>Objectives</b>                 | 7  | Provide an explicit statement of the question(s) the review will address with reference to participants, interventions, comparators, and outcomes (PICO)                                        | √                    |    | 255-260        |
| <b>METHODS</b>                    |    |                                                                                                                                                                                                 |                      |    |                |

| Section/topic                             | #   | Checklist item                                                                                                                                                                                                                              | Information reported |    | Line number(s)      |
|-------------------------------------------|-----|---------------------------------------------------------------------------------------------------------------------------------------------------------------------------------------------------------------------------------------------|----------------------|----|---------------------|
|                                           |     |                                                                                                                                                                                                                                             | Yes                  | No |                     |
| <b>Eligibility criteria</b>               | 8   | Specify the study characteristics (e.g., PICO, study design, setting, time frame) and report characteristics (e.g., years considered, language, publication status) to be used as criteria for eligibility for the review                   | √                    |    | 248-260             |
| <b>Information sources</b>                | 9   | Describe all intended information sources (e.g., electronic databases, contact with study authors, trial registers, or other grey literature sources) with planned dates of coverage                                                        | √                    |    | 284-292             |
| <b>Search strategy</b>                    | 10  | Present draft of search strategy to be used for at least one electronic database, including planned limits, such that it could be repeated                                                                                                  | √                    |    | 288-302;<br>Table 1 |
| <b>STUDY RECORDS</b>                      |     |                                                                                                                                                                                                                                             |                      |    |                     |
| Data management                           | 11a | Describe the mechanism(s) that will be used to manage records and data throughout the review                                                                                                                                                |                      | √  | 313-321             |
| Selection process                         | 11b | State the process that will be used for selecting studies (e.g., two independent reviewers) through each phase of the review (i.e., screening, eligibility, and inclusion in meta-analysis)                                                 | √                    |    | 329-334             |
| Data collection process                   | 11c | Describe planned method of extracting data from reports (e.g., piloting forms, done independently, in duplicate), any processes for obtaining and confirming data from investigators                                                        | √                    |    | 313-321             |
| <b>Data items</b>                         | 12  | List and define all variables for which data will be sought (e.g., PICO items, funding sources), any pre-planned data assumptions and simplifications                                                                                       | √                    |    | 255-260             |
| <b>Outcomes and prioritization</b>        | 13  | List and define all outcomes for which data will be sought, including prioritization of main and additional outcomes, with rationale                                                                                                        | √                    |    | 271-281             |
| <b>Risk of bias in individual studies</b> | 14  | Describe anticipated methods for assessing risk of bias of individual studies, including whether this will be done at the outcome or study level, or both; state how this information will be used in data synthesis                        | √                    |    | 329-334             |
| <b>DATA</b>                               |     |                                                                                                                                                                                                                                             |                      |    |                     |
| <b>Synthesis</b>                          | 15a | Describe criteria under which study data will be quantitatively synthesized                                                                                                                                                                 | √                    |    | 285-295             |
|                                           | 15b | If data are appropriate for quantitative synthesis, describe planned summary measures, methods of handling data, and methods of combining data from studies, including any planned exploration of consistency (e.g., $I^2$ , Kendall's tau) | √                    |    | 345-360             |
|                                           | 15c | Describe any proposed additional analyses (e.g., sensitivity or subgroup analyses, meta-regression)                                                                                                                                         | √                    |    | 345-360             |
|                                           | 15d | If quantitative synthesis is not appropriate, describe the type of summary planned                                                                                                                                                          | √                    |    | 355-360             |
| <b>Meta-bias(es)</b>                      | 16  | Specify any planned assessment of meta-bias(es) (e.g., publication bias across studies, selective reporting within studies)                                                                                                                 | √                    |    | 329-334             |

| Section/topic                     | #  | Checklist item                                                                   | Information reported |    | Line number(s) |
|-----------------------------------|----|----------------------------------------------------------------------------------|----------------------|----|----------------|
|                                   |    |                                                                                  | Yes                  | No |                |
| Confidence in cumulative evidence | 17 | Describe how the strength of the body of evidence will be assessed (e.g., GRADE) | √                    |    | 362-367        |

For peer review only

# BMJ Open

## The Impact of Mobile Applications on Adherence to Cancer Treatment: a Systematic Review and Meta-analysis Protocol

|                                 |                                                                                                                                                                                                                                                                                                                                                                                                                                                                                                                                             |
|---------------------------------|---------------------------------------------------------------------------------------------------------------------------------------------------------------------------------------------------------------------------------------------------------------------------------------------------------------------------------------------------------------------------------------------------------------------------------------------------------------------------------------------------------------------------------------------|
| Journal:                        | <i>BMJ Open</i>                                                                                                                                                                                                                                                                                                                                                                                                                                                                                                                             |
| Manuscript ID                   | bmjopen-2018-027246.R3                                                                                                                                                                                                                                                                                                                                                                                                                                                                                                                      |
| Article Type:                   | Protocol                                                                                                                                                                                                                                                                                                                                                                                                                                                                                                                                    |
| Date Submitted by the Author:   | 27-Aug-2019                                                                                                                                                                                                                                                                                                                                                                                                                                                                                                                                 |
| Complete List of Authors:       | Medeiros, Kleyton ; Universidade Federal do Rio Grande do Norte Queiroz, Janice; Universidade Federal do Rio Grande do Norte Centro de Ciencias da Saude<br>Monteiro, Michelly; Universidade Federal do Rio Grande do Norte Costa, Weruska; Universidade Federal do Rio Grande do Norte Centro de Ciencias da Saude<br>Cobucci, Ricardo; Universidade Potiguar Unidade Salgado Filho<br>Stransky, Beatriz; Universidade Federal do Rio Grande do Norte Centro de Tecnologia<br>Gonçalves, Ana ; Universidade Federal do Rio Grande do Norte |
| <b>Primary Subject Heading</b>: | Oncology                                                                                                                                                                                                                                                                                                                                                                                                                                                                                                                                    |
| Secondary Subject Heading:      | Communication, Nursing                                                                                                                                                                                                                                                                                                                                                                                                                                                                                                                      |
| Keywords:                       | mobile application, medication adherence, oral anticancer agents, Health informatics < BIOTECHNOLOGY & BIOINFORMATICS, patient compliance                                                                                                                                                                                                                                                                                                                                                                                                   |
|                                 |                                                                                                                                                                                                                                                                                                                                                                                                                                                                                                                                             |

SCHOLARONE™  
Manuscripts



1  
2  
3 **The Impact of Mobile Applications on Adherence to Cancer Treatment: a**  
4 **Systematic Review and Meta-analysis Protocol**  
5  
6  
7

8 Kleyton Santos de Medeiros<sup>1</sup>, Janice França Queiroz<sup>1</sup>, Michelly Nóbrega  
9 Monteiro<sup>1</sup>, Weruska Alcoforado Costa<sup>1</sup>, Ricardo Ney Cobucci<sup>2</sup>, Beatriz  
10 Stransky<sup>3</sup>, Ana Katherine Goncalves<sup>1,2</sup>  
11  
12  
13  
14

15 <sup>1</sup>Postgraduate Program in Health Sciences, Federal University of Rio Grande  
16 do Norte, Natal, Brazil.  
17

18 <sup>2</sup>Postgraduate Program in Biotechnology, Potiguar University, UnP Natal,  
19 Brazil.  
20  
21

22 <sup>3</sup>Department of Gynecology and Obstetrics, Federal University of Rio Grande  
23 do Norte, Natal, Brazil.  
24

25 <sup>4</sup>Department of Biomedical engineering, Federal University of Rio Grande do  
26 Norte, Natal, Brazil.  
27  
28  
29

30 \*Corresponding author:

31 Ana Katherine Gonçalves

32 E-mail address: anakatherine\_ufrnet@yahoo.com.br  
33  
34  
35  
36  
37

38 Conflict of Interest statement: None  
39  
40  
41  
42  
43  
44  
45  
46  
47  
48  
49  
50  
51  
52  
53  
54  
55  
56  
57  
58  
59  
60

## ABSTRACT

### Introduction

The number of patients taking oral chemotherapy is increasing around the world. It is essential to maximize adherence to oral chemotherapy to improve overall survival and life expectancy. This systematic review aims to evaluate the effectiveness of mobile applications in the improvement of adherence to oral chemotherapy and adjuvant hormonal therapy among cancer survivors.

### Methods and analysis

The databases MEDLINE, Embase, LILACS, clinicaltrials.gov, Scopus and Cochrane Central Register of Controlled Trials will be used to search for any studies where there was randomization or quasi-experimental designs using mobile applications among cancer survivors to aid adherence to oral chemotherapy and adjuvant hormonal therapy from 2009 to July 2019. Other interventions such as: patient education, reminder tools, calendars, pillboxes and electronic reminders will not be evaluated. The primary outcome will be the improved adherence to medication in cancer treatment. The secondary outcomes will be an improvement in overall survival and life expectancy, improved quality of life and control of symptoms related to cancer. Three independent reviewers will select trials and extract data from the original publications. The risk of bias will be assessed according to the Cochrane Risk of Bias tool. Data synthesis will be performed using the Review Manager software (RevMan V.5.2.3). To assess heterogeneity, we will compute the  $I^2$  statistic. Additionally, a quantitative synthesis will be used if the included studies are sufficiently homogenous.

### Ethics and dissemination

This study will be a review of the published data, and thus it is not necessary to obtain ethical approval. Findings of this systematic review will be published in a peer-reviewed journal.

**Trial registration number:** International Prospective Register of Systematic Reviews (PROSPERO) 2018: CRD42018102172.

## STRENGTHS AND LIMITATIONS OF THIS STUDY

- This systematic review/meta-analysis aims to combine the results of different studies that have comparable effect sizes that can be computed.
- Three reviewers will independently select the eligibility trials to be included in this review, extract data without different variables and assess the risk of bias.
- However, it may be that we will only get a small sample size and a limited number of studies, which may influence the validity and reliability of the findings.
- Additionally, different types of mobile app may cause considerable heterogeneity that could be deficient in generating convincing conclusions.
- Despite these limitations, the results obtained from this systematic review and meta-analysis will propose which strategy is most useful for the improvement of adherence to oral chemotherapeutic treatment, choosing between the mobile app and other approaches.

## INTRODUCTION

### Description of the condition

About 25% of new antineoplastic agents in development are estimated to be oral drugs, and the number of available oral chemotherapy medications is expected to more than double over the next few years (1-3). Patients often prefer oral therapy to IV therapy for several reasons. The benefits of oral agents for cancer are patient preference, convenience of use, easier administration and more convenience for patients because they result in fewer office visits and less time is spent receiving treatment compared to IV chemotherapy (4,5). Additionally, oral therapy can provide a feeling of control over treatment, decrease treatment interference with work and social activities, eliminating the travel time needed to go to an infusion clinic, and eliminate the discomfort of having an IV line inserted for each administration (2). Once an antineoplastic agent is ordered, the administration is the responsibility of the patient (5). Yet patients and clinicians face new challenges in managing adherence to these oral therapies (6).

Although most of the patients attempt to adhere to these medications as prescribed, there is adherence problem yet. No reliable estimate of adherence to oral antineoplastic therapies can be obtained from the literature, due to the

1  
2  
3 fact that the few intervention studies for adherence that there are have notable  
4 methodological concerns, thereby limiting the evidence to guide the practice in  
5 promoting medication adherence among patients with cancer (6). Thus, the  
6 problem of non-adherence to treatment and pharmacological limitations are still  
7 poorly studied (3).  
8  
9

10  
11  
12  
13 Hershman et al. (7) found that interventions to enhance the psychosocial well-  
14 being of patients should be evaluated to increase adherence. Furthermore, the  
15 authors explain that adherence to therapy has been reported to be associated  
16 with belief in the efficacy of the medication and with belief in the benefits of  
17 taking prescribed medications more generally; and high levels of cancer-specific  
18 emotional distress were associated with subsequent non-persistence in  
19 treatment (7).  
20  
21  
22  
23  
24  
25

26  
27 Another important finding is that the perception of poor physician–patient  
28 communication, negative beliefs regarding efficacy of the medication and fear of  
29 toxicities are associated with failure to initiate the therapy (6).  
30  
31  
32  
33

34 In a systematic review, Greer et al. (6) assessed interventions to improve  
35 adherence to oral antineoplastic therapies for patients with various  
36 malignancies. Interventions varied in format, and included educational support,  
37 treatment monitoring, pharmacy-based programs, counseling programs,  
38 prefilled pill boxes, and automated voice response systems. Nevertheless, most  
39 of these suffered high risk of bias due to nonrandomized designs, small sample  
40 sizes, subjective assessments of adherence, and missing data concerns. In  
41 another systematic review of interventions to promote adherence to oral  
42 antineoplastic therapies that has been published to date, the investigators drew  
43 similar conclusions (8).  
44  
45  
46  
47  
48  
49  
50  
51

52  
53 Moreover, a variety of educational, symptom management and reminder- based  
54 interventions, which involve delivery mechanisms such as face-to-face  
55 interactions, phone calls and SMS texting have been developed and tested.  
56 However, the evidence on the effectiveness of the interventions is not yet  
57 conclusive (9-11).  
58  
59  
60

## Description of the intervention

The American Society of Clinical Oncology/Oncology Nursing Society recommend patient education in the oral chemotherapy administration (12).

Patient education includes:

- The storage, handling, preparation, administration, and disposal of oral chemotherapy;
- Concurrent cancer treatment and supportive care medications/measures (when applicable);
- Possible drug/drug and drug/food interactions;
- The plan for missed doses (12).

In this context, oncology nurses can use tools and technology to assist with education, which may promote adherence with the suggestion of reminder tools that can be used. Many have already been developed: patient education; physical devices such as pillboxes and glowing pill bottles; or computer and mobile applications (apps) to work as electronic reminders, such as calendars, text messaging, and alarms (5, 13-14).

In this sense, there are mobile applications (MA) that are computer programs or software installed on mobile electronic devices which support a wide range of functions and uses, which include television, telephone, video, music, word processing, and internet service (15). The first medication reminder apps were developed in 2009 (5,6).

The advantages of MA over other interventions are simplicity and ease of administration, often in an automated fashion using a computerized program (6). Thus, MA may be useful for promoting healthy behaviors and lifestyles while monitoring, tracking, collecting and transmitting data in real time, facilitating the doctor-patient communication, and increasing the level of sharing and cooperation between the patient and health professionals (7).

Several techniques may increase adherence to treatment. However, most effective interventions include behavioral approaches and there is no

1  
2  
3 consensus on which behavioral techniques (e.g., specific goal setting, self-  
4 monitoring, and social comparison) are central to effective medication  
5 adherence interventions (7).  
6  
7  
8  
9

10 With the ever-growing presence of smartphones and the potential for efficacious  
11 behavioral intervention technology, scientists may implement momentary  
12 interventions and momentary assessments in order to collect data in real-time in  
13 real and convenient real-world situations. Along with this, researchers are thus  
14 able to optimize the delivery of behavioral interventions and collect ongoing  
15 data with minimal burden to the patient and provider (11).  
16  
17  
18  
19

20 A recent review indicates that adopting mobile technologies to deliver  
21 accessible interventions can improve health behaviors in patients with cancer  
22 (13).  
23  
24  
25  
26

27 Therefore, this protocol aims to verify if the use of mobile applications improves  
28 the patient adherence to medication in cancer treatment.  
29  
30  
31

### 32 **Intervention mechanisms**

33  
34 In the treatment of chronic diseases, drug adherence remains a complicated  
35 issue. (8-14,16-18). In these situations, the benefits of using technology as an  
36 enabling factor are recognized, even if it is a simple text message (19). This  
37 may improve adherence to the prescribed dosage, with an increase in  
38 adherence rates ranging from 50% to 67.8% (14).  
39  
40  
41  
42  
43

44 Apps are suitable for delivering various educational and behavioral interventions  
45 while enabling caregivers and health professionals to monitor patients'  
46 medication consumption patterns (10).  
47  
48  
49  
50

### 51 **Why it is important to perform this review**

52  
53 Traditional interventions to improve adherence and that are effective for long-  
54 term care are complex and not widely used. There is a widespread need for  
55 convenient and feasible innovations to help patients remain adherent to  
56 medications (18).  
57  
58  
59  
60

1  
2  
3 Presently, the average rate of non-adherence to oral anti-cancer therapy is  
4 estimated to be around 21% (4), demonstrating that poor adherence is a barrier  
5 to completing the treatment (18,19). Non-adherence is complex and systemic,  
6 as well as this, while at home there is no professional oversight to know  
7 whether patients are correctly taking the medication as prescribed. Oral  
8 regimens may come with complicated dosing schedules or various foods and  
9 drug interactions that make adherence difficult. In busy clinics, patients may be  
10 given written materials about the new medication, but little time may be  
11 available for one-on-one interaction (5). Ensuring patient adherence to a  
12 treatment that involves self-administration is a challenge that is faced by health  
13 care providers (2,20). Many factors can affect the treatment adherence: lack of  
14 understanding regarding proper administration, complex dosing regimens,  
15 administration of other potentially interacting medications, the timing of  
16 treatment doses concerning food intake, cost of the drug, and unpleasant side  
17 effects. Furthermore, common health conditions of the patients such as visual  
18 and cognitive impairment, memory deficits or forgetfulness can pose other  
19 difficulties (2).

20  
21  
22  
23  
24  
25  
26  
27  
28  
29  
30  
31  
32  
33  
34  
35  
36  
37  
38  
39  
40  
41  
42  
43  
44  
45  
46  
47  
48  
49  
50  
51  
52  
53  
54  
55  
56  
57  
58  
59  
60  
61  
62  
63  
64  
65  
66  
67  
68  
69  
70  
71  
72  
73  
74  
75  
76  
77  
78  
79  
80  
81  
82  
83  
84  
85  
86  
87  
88  
89  
90  
91  
92  
93  
94  
95  
96  
97  
98  
99  
100  
101  
102  
103  
104  
105  
106  
107  
108  
109  
110  
111  
112  
113  
114  
115  
116  
117  
118  
119  
120  
121  
122  
123  
124  
125  
126  
127  
128  
129  
130  
131  
132  
133  
134  
135  
136  
137  
138  
139  
140  
141  
142  
143  
144  
145  
146  
147  
148  
149  
150  
151  
152  
153  
154  
155  
156  
157  
158  
159  
160  
161  
162  
163  
164  
165  
166  
167  
168  
169  
170  
171  
172  
173  
174  
175  
176  
177  
178  
179  
180  
181  
182  
183  
184  
185  
186  
187  
188  
189  
190  
191  
192  
193  
194  
195  
196  
197  
198  
199  
200  
201  
202  
203  
204  
205  
206  
207  
208  
209  
210  
211  
212  
213  
214  
215  
216  
217  
218  
219  
220  
221  
222  
223  
224  
225  
226  
227  
228  
229  
230  
231  
232  
233  
234  
235  
236  
237  
238  
239  
240  
241  
242  
243  
244  
245  
246  
247  
248  
249  
250  
251  
252  
253  
254  
255  
256  
257  
258  
259  
260  
261  
262  
263  
264  
265  
266  
267  
268  
269  
270  
271  
272  
273  
274  
275  
276  
277  
278  
279  
280  
281  
282  
283  
284  
285  
286  
287  
288  
289  
290  
291  
292  
293  
294  
295  
296  
297  
298  
299  
300  
301  
302  
303  
304  
305  
306  
307  
308  
309  
310  
311  
312  
313  
314  
315  
316  
317  
318  
319  
320  
321  
322  
323  
324  
325  
326  
327  
328  
329  
330  
331  
332  
333  
334  
335  
336  
337  
338  
339  
340  
341  
342  
343  
344  
345  
346  
347  
348  
349  
350  
351  
352  
353  
354  
355  
356  
357  
358  
359  
360  
361  
362  
363  
364  
365  
366  
367  
368  
369  
370  
371  
372  
373  
374  
375  
376  
377  
378  
379  
380  
381  
382  
383  
384  
385  
386  
387  
388  
389  
390  
391  
392  
393  
394  
395  
396  
397  
398  
399  
400  
401  
402  
403  
404  
405  
406  
407  
408  
409  
410  
411  
412  
413  
414  
415  
416  
417  
418  
419  
420  
421  
422  
423  
424  
425  
426  
427  
428  
429  
430  
431  
432  
433  
434  
435  
436  
437  
438  
439  
440  
441  
442  
443  
444  
445  
446  
447  
448  
449  
450  
451  
452  
453  
454  
455  
456  
457  
458  
459  
460  
461  
462  
463  
464  
465  
466  
467  
468  
469  
470  
471  
472  
473  
474  
475  
476  
477  
478  
479  
480  
481  
482  
483  
484  
485  
486  
487  
488  
489  
490  
491  
492  
493  
494  
495  
496  
497  
498  
499  
500  
501  
502  
503  
504  
505  
506  
507  
508  
509  
510  
511  
512  
513  
514  
515  
516  
517  
518  
519  
520  
521  
522  
523  
524  
525  
526  
527  
528  
529  
530  
531  
532  
533  
534  
535  
536  
537  
538  
539  
540  
541  
542  
543  
544  
545  
546  
547  
548  
549  
550  
551  
552  
553  
554  
555  
556  
557  
558  
559  
560  
561  
562  
563  
564  
565  
566  
567  
568  
569  
570  
571  
572  
573  
574  
575  
576  
577  
578  
579  
580  
581  
582  
583  
584  
585  
586  
587  
588  
589  
590  
591  
592  
593  
594  
595  
596  
597  
598  
599  
600  
601  
602  
603  
604  
605  
606  
607  
608  
609  
610  
611  
612  
613  
614  
615  
616  
617  
618  
619  
620  
621  
622  
623  
624  
625  
626  
627  
628  
629  
630  
631  
632  
633  
634  
635  
636  
637  
638  
639  
640  
641  
642  
643  
644  
645  
646  
647  
648  
649  
650  
651  
652  
653  
654  
655  
656  
657  
658  
659  
660  
661  
662  
663  
664  
665  
666  
667  
668  
669  
670  
671  
672  
673  
674  
675  
676  
677  
678  
679  
680  
681  
682  
683  
684  
685  
686  
687  
688  
689  
690  
691  
692  
693  
694  
695  
696  
697  
698  
699  
700  
701  
702  
703  
704  
705  
706  
707  
708  
709  
710  
711  
712  
713  
714  
715  
716  
717  
718  
719  
720  
721  
722  
723  
724  
725  
726  
727  
728  
729  
730  
731  
732  
733  
734  
735  
736  
737  
738  
739  
740  
741  
742  
743  
744  
745  
746  
747  
748  
749  
750  
751  
752  
753  
754  
755  
756  
757  
758  
759  
760  
761  
762  
763  
764  
765  
766  
767  
768  
769  
770  
771  
772  
773  
774  
775  
776  
777  
778  
779  
780  
781  
782  
783  
784  
785  
786  
787  
788  
789  
790  
791  
792  
793  
794  
795  
796  
797  
798  
799  
800  
801  
802  
803  
804  
805  
806  
807  
808  
809  
810  
811  
812  
813  
814  
815  
816  
817  
818  
819  
820  
821  
822  
823  
824  
825  
826  
827  
828  
829  
830  
831  
832  
833  
834  
835  
836  
837  
838  
839  
840  
841  
842  
843  
844  
845  
846  
847  
848  
849  
850  
851  
852  
853  
854  
855  
856  
857  
858  
859  
860  
861  
862  
863  
864  
865  
866  
867  
868  
869  
870  
871  
872  
873  
874  
875  
876  
877  
878  
879  
880  
881  
882  
883  
884  
885  
886  
887  
888  
889  
890  
891  
892  
893  
894  
895  
896  
897  
898  
899  
900  
901  
902  
903  
904  
905  
906  
907  
908  
909  
910  
911  
912  
913  
914  
915  
916  
917  
918  
919  
920  
921  
922  
923  
924  
925  
926  
927  
928  
929  
930  
931  
932  
933  
934  
935  
936  
937  
938  
939  
940  
941  
942  
943  
944  
945  
946  
947  
948  
949  
950  
951  
952  
953  
954  
955  
956  
957  
958  
959  
960  
961  
962  
963  
964  
965  
966  
967  
968  
969  
970  
971  
972  
973  
974  
975  
976  
977  
978  
979  
980  
981  
982  
983  
984  
985  
986  
987  
988  
989  
990  
991  
992  
993  
994  
995  
996  
997  
998  
999  
1000

Poor adherence has been linked to successive hospitalizations, increased need for medical interventions, morbidity, and mortality. As well as this, medication non-adherence results in increased health care costs, with North America having estimates of approximately \$100 billion being spent annually and \$2000 spent per patient per year in excess physician visits (19).

In this context, it is necessary to verify if the use of mobile applications can help the patient to overcome those difficulties and improve the adherence to treatment. Despite the increased use of oral chemotherapy, the number of studies addressing the issue of adherence remains surprisingly low (20).

### **Objectives**

This systematic review and meta-analysis protocol aims to evaluate the effectiveness of mobile applications in the improvement of adherence to oral chemotherapy and adjuvant hormonal therapy among cancer survivors.

## Materials and methods

This protocol is registered with the International Prospective Register of Systematic Reviews (PROSPERO), registration number CRD42018102172. The Preferred Reporting Items for Systematic Reviews and Meta-Analyses (PRISMA) (21) statement guidelines were used to construct this systematic review protocol.

## Types of studies

This systematic review will include studies that fall into these criteria: studies where there was randomization or with quasi-experimental designs; that include adult subjects (above 18 years of age); that evaluate the use of mobile applications for adherence to oral chemotherapy and adjuvant hormonal therapy among cancer survivors; and no language restrictions.

## The PICO strategy

- Population/Participants: Patients undergoing oncological treatment with oral chemotherapy or adjuvant hormonal therapy
- Intervention: Use of mobile application
- Comparator/control: Non-use of mobile application
- Outcome: Improvement adherence to medication in cancer treatment.

## Types of patients

Participants of the studies are adults (older than 18 years) diagnosed with cancer, ongoing oral chemotherapy or adjuvant hormonal therapy and using mobile applications to improve their adherence to medication.

## Types of interventions

Studies that compare the use of the mobile application with a concurrent control group to evaluate adherence.

## Types of outcome measures

As a consequence of the absence of the correct intake of doses of oral medication by the cancer patient, there may be additional treatment costs due



to the increased frequency of hospitalization and return to medical appointments, reappearance of symptoms, and consequent increase in drug toxicity due to overdosage (to make up for the missed dose) (4, 22-25).

The primary outcome will be the improved adherence to medication in cancer treatment (17). The secondary outcomes will be an improvement in overall survival and life expectancy, improved quality of life and control of symptoms related to cancer (9-11).

## Search methods for identification of studies

### Electronic searches

The Cochrane Central Register of Controlled Trials in The Cochrane Library, clinicaltrials.gov, Medline, LILACS, Scopus and Embase will be used to search for articles dated from 2009 to July 2019. No language restrictions will be used. The MESH terms will be: (antineoplastic agents OR oral anticancer agents OR drug therapy) AND (mobile application OR mobile apps OR app OR smartphone OR health informatics OR mobile health) AND (medication adherence OR patient empowerment OR treatment adherence and compliance).

### Other sources

The scope of the computerized literature search may be enlarged based on the reference lists of retrieved articles.

### Search strategy

Table 1 presents the search strategy for Medline.

**Table 1 Medline search strategy**

| Search items |                        |
|--------------|------------------------|
| 1            | antineoplastic agents  |
| 2            | oral anticancer agents |
| 3            | drug therapy           |
| 4            | Or/1-3                 |
| 5            | mobile application     |

|    |                                    |
|----|------------------------------------|
| 6  | mobile apps                        |
| 7  | Smartphone                         |
| 8  | health informatics                 |
| 9  | mobile health                      |
| 10 | Or/5-9                             |
| 11 | medication adherence               |
| 12 | patient participation              |
| 13 | patient compliance                 |
| 14 | treatment adherence and compliance |
| 15 | MedicationTherapy Management       |
| 16 | Or/11-15                           |
| 17 | 4 and 10 and 16                    |

## Data collection and analysis

### Selection of studies

Three authors, KSM, WAC, and JFQ, will independently screen the search results using titles and abstracts. Duplicates and reviews will be removed from the database. Two reviewers, KSM and MNM will then go through the full text to determine whether they meet the inclusion criteria. Discrepancies will be resolved by a third reviewer, AKG. The selection of the studies is summarized in a PRISMA flow diagram (figure 1).

Insert **Figure 1**: PRISMA flow diagram.

### Data extraction and management

Various study characteristics will be extracted from the original research and included in the systematic review and meta-analysis. The data to be included are the first authors' last names, year of publication, location of the study (country), study design, primary objective, population, sample size, follow-up period, inclusion/exclusion criteria, type of MA used, type of control used, and primary results. Standardized data extraction forms will specifically be created for this review and the results will be subsequently entered into a database. All data entries will be double-checked.

### **Addressing missing data**

We will attempt to obtain any missing data by contacting the first or corresponding authors or coauthors of an article via phone, email or post. If we fail to receive any necessary information, the data will be excluded from our analysis and will be addressed in the discussion section.

### **Risk of bias assessment**

Three review authors, KSM, JFQ and BS, will independently assess the risk of bias in the included studies using the Cochrane risk of bias tool (25). The modified Cochrane Collaboration tool will be used to assess risk of bias. Bias is assessed as a judgment (high, low, or unclear) for individual elements from five domains (selection, performance, attrition, reporting, and other).

### **Assessment of heterogeneity**

The heterogeneity between trial results will be evaluated using a standard  $X^2$  test with a significance level of  $p < 0.1$ . To assess heterogeneity, we plan to compute the  $I^2$  statistic, which is a quantitative measurement of inconsistency across studies. A value of 0% indicates no observed heterogeneity, whereas  $I^2$  values of  $\geq 50\%$  indicate a substantial level of heterogeneity; however, the assessment of heterogeneity will only occur if it is appropriate to undertake a meta-analysis.

### **Analysis**

Data will be entered in the Review Manager software (RevMan5.2.3). This software allows the user to enter protocols, to complete reviews, include text, characteristics of the studies, comparison tables and study data, and to perform meta-analyses of the data. For dichotomous outcomes, we will extract or calculate the odds ratio (OR) and 95% confidence interval (CI) for each study. Where there is heterogeneity ( $I^2 \geq 50\%$ ), a random-effect model will be used to combine the trials to calculate the OR and 95% CI, using the DerSimonian-Laird algorithm in The Meta for Package, a meta-analysis package for R software.

1  
2  
3 Other study characteristics and results will be summarized narratively, if the  
4 meta-analysis cannot be performed for all or some of the included studies.

5 Sensitivity analyses will be important to explore the robustness of the findings  
6 regarding the study quality and sample size, and this is only possible to  
7 consider if a meta-analysis is undertaken. This will be shown in a summary  
8 table.  
9  
10  
11  
12

### 13 14 15 **Confidence in cumulative evidence**

16 To describe the strength of evidence for included data, we will use the Grading  
17 of Recommendation Assessment, Development and Evaluation (GRADE)  
18 approach to incorporate summary assessments into broader measurements to  
19 ensure the judgments about bias risk, consistency, directness, precision and  
20 publication bias (26).  
21  
22  
23  
24  
25  
26

### 27 **Patient and Public Involvement**

28 The research will be performed using a wide and comprehensive search of  
29 literature from databases and the individual patient data will not be included.  
30 Ethical approval is not required because this systematic review will use  
31 published patient data.  
32  
33  
34  
35  
36

## 37 **DISCUSSION**

38 The adherence to cancer treatment is a very common and relevant clinical  
39 problem, with a significant adverse impact on the health system. In this review,  
40 we aim to determine the effect of mobile applications in the improvement of  
41 adherence to medication in cancer treatment. In theory, MA can improve  
42 adherence to cancer treatment, because they can remind the patient of the time  
43 to take the medicine and assist in the management of care. Therefore, MA may  
44 support oncology patients with medication and disease management (27, 28).  
45 We expect that our review will provide accurate data for effective strategies for  
46 adherence to cancer treatment. Furthermore, this review will improve our  
47 understanding of adherence to cancer treatment with mobile applications.  
48  
49  
50  
51  
52  
53  
54  
55  
56  
57

### 58 **Ethics and dissemination**

59  
60

1  
2  
3 Ethical approval is not required because this systematic review will use  
4 published patient data. Findings of this systematic review will be published in a  
5 peer-reviewed journal and updates will be conducted if there is enough new  
6 evidence that may cause any changes in the conclusions of the review.  
7  
8  
9

### 10 11 **Data sharing**

12 All data used in the writing of an article review will be cited in the reference list –  
13 whether they are data generated by the author(s) or by other researchers. That  
14 is, data are publicly available; these will be cited in the reference list.  
15  
16  
17  
18  
19

20 Findings of this systematic review will be published in a peer-reviewed journal  
21 and updates will be conducted if there is enough new evidence that may cause  
22 any change in the review conclusions.  
23  
24  
25  
26

### 27 **Acknowledgments**

28 The authors acknowledge the assistance provided by the Graduate Program in  
29 Health Sciences of the Federal University of Rio Grande do Norte (UFRN) in the  
30 undertaking of literary research.  
31  
32  
33  
34  
35

### 36 **Contributors**

37 KM, BS and AG contributed to the design of this review. KM drafted the protocol  
38 manuscript, and AG revised it. KM, RC and AG developed the search strategies  
39 and KM, JQ and MM will implement them. KM, MM, JQ, and WC will track  
40 potential studies, extract data and assess quality. In case of disagreement  
41 between the data extractors, AG will advise on the methodology and will work  
42 as the referee. RC will complete the data synthesis. All authors have approved  
43 the final version for publication.  
44  
45  
46  
47  
48  
49  
50

### 51 **Funding**

52 The authors have not declared a specific grant for this research from any  
53 funding agency in the public, commercial or not-for-profit sectors.  
54  
55

### 56 **Competing interests**

57 None declared.  
58  
59

### 60 **Patient consent for publication**

1  
2  
3 Not required.  
4  
5

6 **REFERENCES**  
7

- 8  
9  
10  
11  
12  
13  
14  
15  
16  
17  
18  
19  
20  
21  
22  
23  
24  
25  
26  
27  
28  
29  
30  
31  
32  
33  
34  
35  
36  
37  
38  
39  
40  
41  
42  
43  
44  
45  
46  
47  
48  
49  
50  
51  
52  
53  
54  
55  
56  
57  
58  
59  
60
1. Weingart SN, Flug J, Brouillard D, Morway L, Partridge A, Bartel S, Shulman LN, Connor M. Oral chemotherapy safety practices at US cancer centers: questionnaire survey. *BMJ*. 2007 Feb 24;334(7590):407.
  2. Wood L. A review on adherence management in patients on oral cancer therapies. *Eur J Oncol Nurs*. 2012 Sep;16(4):432-8.
  3. Moody M, Jackowski J. Are patients on oral chemotherapy in your practice setting safe? *Clin J Oncol Nurs*. 2010 Jun;14(3):339-46.
  4. Chabrier M, Bezy O, Mouret MA, Bay JO, Jalenques I. Impact of depressive disorders on adherence to oral anti-cancer treatment. *Bull Cancer*. 2013 Oct;100(10):1017-22.
  5. Burhenn, P.S.; Smudde, J. Using tools and technology to promote education and adherence to oral agents for cancer. *Clin J Oncol Nurs*. 2015 Jun;19(3 Suppl):53-9.
  6. Greer JA, Amoyal N, Nisotel L, Fishbein JN, MacDonald J, Stagl J, Lennes I, Temel JS, Safren SA, Pirl WF. A Systematic Review of Adherence to Oral Antineoplastic Therapies. *Oncologist*. 2016 Mar;21(3):354-76.
  7. Hershman DL, Kushi LH, Hillyer GC, Coromilas E, Buono D, Lamerato L, Bovbjerg DH, Mandelblatt JS, Tsai WY, Zhong X, Jacobson JS, Wright JD, Neugut AI. Psychosocial factors related to non-persistence with adjuvant endocrine therapy among women with breast cancer: the Breast Cancer Quality of Care Study (BQUAL). *Breast Cancer Res Treat*. 2016 May;157(1):133-43.
  8. Mathes T, Antoine SL, Pieper D, Eikermann M. Adherence enhancing interventions for oral anticancer agents: a systematic review. *Cancer Treat Rev*. 2014 Feb;40(1):102-8.
  9. Ali EE, Chan SSL, Leow JL, Chew L, Yap KY. User acceptance of an app-based adherence intervention: Perspectives from patients taking oral anticancer medications. *J Oncol Pharm Pract*. 2019 Mar;25(2):390-397.
  10. Ali EE, Chan SSL, Poh HY, Susanto YA, Suganya T, Leow JL, Pang CK, Chew L, Yap KY. Design Considerations in the Development of App-Based Oral Anticancer Medication Management Systems: a Qualitative

- 1  
2  
3 Evaluation of Pharmacists' and Patients' Perspectives. *J Med Syst*. 2019  
4 Feb 6;43(3):63.  
5  
6 11. Fishbein JN, Nisotel LE, MacDonald JJ, Amoyal Pensak N, Jacobs JM,  
7 Flanagan C, Jethwani K, Greer JA. Mobile Application to Promote  
8 Adherence to Oral Chemotherapy and Symptom Management: A Protocol  
9 for Design and Development. *JMIR Res Protoc*. 2017 Apr 20;6(4):e62.  
10  
11 12. Neuss MN, Polovich M, McNiff K, Esper P, Gilmore TR, LeFebvre KB,  
12 Schulmeister L, Jacobson JO. 2013 updated American Society of Clinical  
13 Oncology/Oncology Nursing Society chemotherapy administration safety  
14 standards including standards for the safe administration and  
15 management of oral chemotherapy. *J Oncol Pract*. 2013 Mar;9(2  
16 Suppl):5s-13s.  
17  
18 13. Darlow S, Wen K. Development testing of mobile health interventions for  
19 cancer patient self-management: A review. *Health Informatics J*. 2015 Apr  
20 27:1-18.  
21  
22 14. Jacobs JM, Pensak NA, Sporn NJ, MacDonald JJ, Lennes IT, Safren SA,  
23 Pirl WF, Temel JS, Greer JA. Treatment Satisfaction and Adherence to  
24 Oral Chemotherapy in Patients With Cancer. *J Oncol Pract*. 2017  
25 May;13(5):e474-e485.  
26  
27 15. MEDICINE, U.S. National Library Of MEDICINE. Medical Subject  
28 Headings: Mobile Applications. 2018. Evaluable in:  
29 <<https://www.ncbi.nlm.nih.gov/mesh/68063731>>. Accessed in: March 16.  
30 2019.  
31  
32 16. Elliott M, Liu Y. The nine rights of medication administration: an overview.  
33 *Br J Nurs*. 2010 Mar 11-24;19(5):300-5.  
34  
35 17. Zerillo JA, Goldenberg BA, Kotecha RR, Tewari AK, Jacobson JO,  
36 Krzyzanowska MK Interventions to Improve Oral Chemotherapy Safety  
37 and Quality: A Systematic Review. *JAMA Oncol*. 2018 Jan 1;4(1):105-117.  
38  
39 18. Makubi A, Sasi P, Ngaje M, et al. Rationale and design ofmDOT-  
40 HuAstudy: a randomized trial to assess the effect of mobile-directly  
41 observed therapy on adherence to hydroxyurea in adults with sickle cell  
42 anemia in Tanzania. *BMC Med Res Methodol*. 2016 Oct 18;16(1):140.  
43  
44  
45  
46  
47  
48  
49  
50  
51  
52  
53  
54  
55  
56  
57  
58  
59  
60

19. Thakkar J, Kurup R, Laba, T, et al. Mobile Telephone Text Messaging for Medication Adherence in Chronic Disease: A Meta-analysis. *JAMA Intern Med.* 2016 Mar;176(3):340-9.
20. Barillet M, Prevost V, Joly F, Clarisse B. Oral antineoplastic agents: How do we care about adherence? *Br J Clin Pharmacol.* 2015 Dec;80(6):1289-302.
21. Moher D, Liberati A, Tetzlaff J, Altman DG, PRISMA Group. Preferred reporting items for systematic reviews and meta-analyses: The PRISMA Statement *PLoS Med.* 2009 Jul 21;6(7):e1000097.
22. Shimada CS. Adherence to treatment with oral medications. Rio de Janeiro: Elsevier, 2016.
23. Ruddy K, Mayer E, Partridge A. Patient adherence and persistence with oral anticancer treatment. *CA Cancer J Clin.* 2009 Jan-Feb;59(1):56-66.
24. Jingjin, Grant ES, Vernon MS Oh, Shuchuen li S. Factor affecting therapeutic compliance: A review from the patient's perspective. *Ther Clin Risk Manag.* 2008 Feb;4(1):269-86.
25. Higgins JP, Altman DG, Gøtzsche PC, Jüni P, Moher D, Oxman AD, Savovic J, Schulz KF, Weeks L, Sterne JA. The Cochrane Collaboration's tool for assessing risk of bias in randomised trials. *Cochrane Bias Methods Group; Cochrane Statistical Methods Group. BMJ.* 2011 Oct18;343:d5928.
26. Balshem H, Helfand M, Schünemann HJ, Oxman AD, Kunz R, Brozek J, Vist GE, Falck-Ytter Y, Meerpohl J, Norris S, Guyatt GH. GRADE guidelines: 3. Rating the quality of evidence. *J Clin Epidemiol.* 2011 Apr;64(4):401-6.
27. Jupp JCY<sup>1,2</sup>, Sultani H<sup>3</sup>, Cooper CA<sup>4</sup>, Peterson KA<sup>5</sup>, Truong TH<sup>1,6</sup>. Evaluation of mobile phone applications to support medication adherence and symptom management in oncology patients. *Pediatr Blood Cancer.* 2018 Nov;65(11):e27278.
28. Carmody JK, Denson LA, Hommel KA. Content and Usability Evaluation of Medication Adherence Mobile Applications for Use in Pediatrics. *J Pediatr Psychol.* 2019 Apr 1;44(3):333-342.



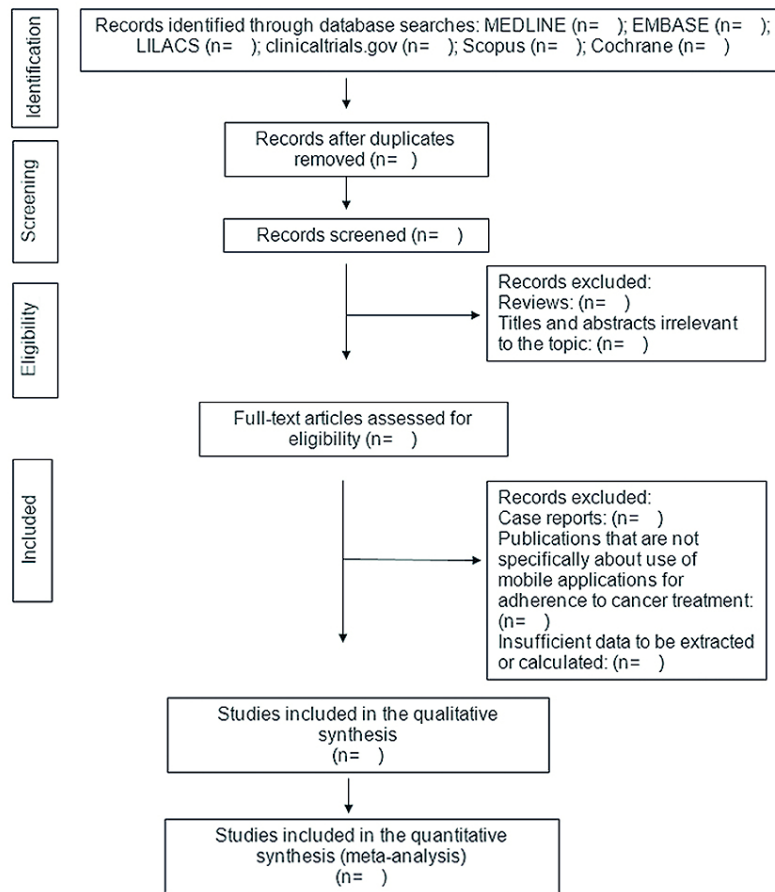

36  
37  
38  
39  
40  
41  
42  
43  
44  
45  
46  
47  
48  
49  
50  
51  
52  
53  
54  
55  
56  
57  
58  
59  
60

Figure 1 Flow diagram of the search for eligible studies in the use of mobile applications for adherence to cancer treatment: CENTRAL, Cochrane Central Register of Controlled Trials.

Figure 1 Flow diagram of the search for eligible studies in the use of mobile applications for adherence to cancer treatment: CENTRAL, Cochrane Central Register of Controlled Trials.

90x90mm (300 x 300 DPI)

## Additional File 1. PRISMA Checklist

An Editorial from the Editors-in-Chief of *Systematic Reviews* details why this checklist was adapted - Moher D, Stewart L & Shekelle P: Implementing PRISMA-P: recommendations for prospective authors. *Systematic Reviews* 2016;5:15

| Section/topic                     | #  | Checklist item                                                                                                                                                                                  | Information reported |    | Line number(s) |
|-----------------------------------|----|-------------------------------------------------------------------------------------------------------------------------------------------------------------------------------------------------|----------------------|----|----------------|
|                                   |    |                                                                                                                                                                                                 | Yes                  | No |                |
| <b>ADMINISTRATIVE INFORMATION</b> |    |                                                                                                                                                                                                 |                      |    |                |
| <b>Title</b>                      |    |                                                                                                                                                                                                 |                      |    |                |
| Identification                    | 1a | Identify the report as a protocol of a systematic review                                                                                                                                        | √                    |    | 2              |
| Update                            | 1b | If the protocol is for an update of a previous systematic review, identify as such                                                                                                              |                      | √  | N/A            |
| <b>Registration</b>               | 2  | If registered, provide the name of the registry (e.g., PROSPERO) and registration number in the Abstract                                                                                        | √                    |    | 64             |
| <b>Authors</b>                    |    |                                                                                                                                                                                                 |                      |    |                |
| Contact                           | 3a | Provide name, institutional affiliation, and e-mail address of all protocol authors; provide physical mailing address of corresponding author                                                   | √                    |    | 4-21           |
| Contributions                     | 3b | Describe contributions of protocol authors and identify the guarantor of the review                                                                                                             | √                    |    | 397-404        |
| <b>Amendments</b>                 | 4  | If the protocol represents an amendment of a previously completed or published protocol, identify as such and list changes; otherwise, state plan for documenting important protocol amendments |                      | √  | N/A            |
| <b>Support</b>                    |    |                                                                                                                                                                                                 |                      |    |                |
| Sources                           | 5a | Indicate sources of financial or other support for the review                                                                                                                                   | √                    |    | 406-409        |
| Sponsor                           | 5b | Provide name for the review funder and/or sponsor                                                                                                                                               |                      | √  | N/A            |
| Role of sponsor/funder            | 5c | Describe roles of funder(s), sponsor(s), and/or institution(s), if any, in developing the protocol                                                                                              |                      | √  | N/A            |
| <b>INTRODUCTION</b>               |    |                                                                                                                                                                                                 |                      |    |                |
| <b>Rationale</b>                  | 6  | Describe the rationale for the review in the context of what is already known                                                                                                                   | √                    |    | 200-233        |
| <b>Objectives</b>                 | 7  | Provide an explicit statement of the question(s) the review will address with reference to participants, interventions, comparators, and outcomes (PICO)                                        | √                    |    | 255-260        |
| <b>METHODS</b>                    |    |                                                                                                                                                                                                 |                      |    |                |

| Section/topic                             | #   | Checklist item                                                                                                                                                                                                                              | Information reported |    | Line number(s)      |
|-------------------------------------------|-----|---------------------------------------------------------------------------------------------------------------------------------------------------------------------------------------------------------------------------------------------|----------------------|----|---------------------|
|                                           |     |                                                                                                                                                                                                                                             | Yes                  | No |                     |
| <b>Eligibility criteria</b>               | 8   | Specify the study characteristics (e.g., PICO, study design, setting, time frame) and report characteristics (e.g., years considered, language, publication status) to be used as criteria for eligibility for the review                   | √                    |    | 248-260             |
| <b>Information sources</b>                | 9   | Describe all intended information sources (e.g., electronic databases, contact with study authors, trial registers, or other grey literature sources) with planned dates of coverage                                                        | √                    |    | 284-292             |
| <b>Search strategy</b>                    | 10  | Present draft of search strategy to be used for at least one electronic database, including planned limits, such that it could be repeated                                                                                                  | √                    |    | 288-302;<br>Table 1 |
| <b>STUDY RECORDS</b>                      |     |                                                                                                                                                                                                                                             |                      |    |                     |
| Data management                           | 11a | Describe the mechanism(s) that will be used to manage records and data throughout the review                                                                                                                                                |                      | √  | 313-321             |
| Selection process                         | 11b | State the process that will be used for selecting studies (e.g., two independent reviewers) through each phase of the review (i.e., screening, eligibility, and inclusion in meta-analysis)                                                 | √                    |    | 329-334             |
| Data collection process                   | 11c | Describe planned method of extracting data from reports (e.g., piloting forms, done independently, in duplicate), any processes for obtaining and confirming data from investigators                                                        | √                    |    | 313-321             |
| <b>Data items</b>                         | 12  | List and define all variables for which data will be sought (e.g., PICO items, funding sources), any pre-planned data assumptions and simplifications                                                                                       | √                    |    | 255-260             |
| <b>Outcomes and prioritization</b>        | 13  | List and define all outcomes for which data will be sought, including prioritization of main and additional outcomes, with rationale                                                                                                        | √                    |    | 271-281             |
| <b>Risk of bias in individual studies</b> | 14  | Describe anticipated methods for assessing risk of bias of individual studies, including whether this will be done at the outcome or study level, or both; state how this information will be used in data synthesis                        | √                    |    | 329-334             |
| <b>DATA</b>                               |     |                                                                                                                                                                                                                                             |                      |    |                     |
| <b>Synthesis</b>                          | 15a | Describe criteria under which study data will be quantitatively synthesized                                                                                                                                                                 | √                    |    | 285-295             |
|                                           | 15b | If data are appropriate for quantitative synthesis, describe planned summary measures, methods of handling data, and methods of combining data from studies, including any planned exploration of consistency (e.g., $I^2$ , Kendall's tau) | √                    |    | 345-360             |
|                                           | 15c | Describe any proposed additional analyses (e.g., sensitivity or subgroup analyses, meta-regression)                                                                                                                                         | √                    |    | 345-360             |
|                                           | 15d | If quantitative synthesis is not appropriate, describe the type of summary planned                                                                                                                                                          | √                    |    | 355-360             |
| <b>Meta-bias(es)</b>                      | 16  | Specify any planned assessment of meta-bias(es) (e.g., publication bias across studies, selective reporting within studies)                                                                                                                 | √                    |    | 329-334             |

| Section/topic                     | #  | Checklist item                                                                   | Information reported |    | Line number(s) |
|-----------------------------------|----|----------------------------------------------------------------------------------|----------------------|----|----------------|
|                                   |    |                                                                                  | Yes                  | No |                |
| Confidence in cumulative evidence | 17 | Describe how the strength of the body of evidence will be assessed (e.g., GRADE) | √                    |    | 362-367        |

For peer review only

# BMJ Open

## The Impact of Mobile Applications on Adherence to Cancer Treatment: a Systematic Review and Meta-analysis Protocol

|                                 |                                                                                                                                                                                                                                                                                                                                                                                                                                                                                                                                             |
|---------------------------------|---------------------------------------------------------------------------------------------------------------------------------------------------------------------------------------------------------------------------------------------------------------------------------------------------------------------------------------------------------------------------------------------------------------------------------------------------------------------------------------------------------------------------------------------|
| Journal:                        | <i>BMJ Open</i>                                                                                                                                                                                                                                                                                                                                                                                                                                                                                                                             |
| Manuscript ID                   | bmjopen-2018-027246.R4                                                                                                                                                                                                                                                                                                                                                                                                                                                                                                                      |
| Article Type:                   | Protocol                                                                                                                                                                                                                                                                                                                                                                                                                                                                                                                                    |
| Date Submitted by the Author:   | 14-Sep-2019                                                                                                                                                                                                                                                                                                                                                                                                                                                                                                                                 |
| Complete List of Authors:       | Medeiros, Kleyton ; Universidade Federal do Rio Grande do Norte Queiroz, Janice; Universidade Federal do Rio Grande do Norte Centro de Ciencias da Saude<br>Monteiro, Michelly; Universidade Federal do Rio Grande do Norte Costa, Weruska; Universidade Federal do Rio Grande do Norte Centro de Ciencias da Saude<br>Cobucci, Ricardo; Universidade Potiguar Unidade Salgado Filho<br>Stransky, Beatriz; Universidade Federal do Rio Grande do Norte Centro de Tecnologia<br>Gonçalves, Ana ; Universidade Federal do Rio Grande do Norte |
| <b>Primary Subject Heading</b>: | Oncology                                                                                                                                                                                                                                                                                                                                                                                                                                                                                                                                    |
| Secondary Subject Heading:      | Communication, Nursing                                                                                                                                                                                                                                                                                                                                                                                                                                                                                                                      |
| Keywords:                       | mobile application, medication adherence, oral anticancer agents, Health informatics < BIOTECHNOLOGY & BIOINFORMATICS, patient compliance                                                                                                                                                                                                                                                                                                                                                                                                   |
|                                 |                                                                                                                                                                                                                                                                                                                                                                                                                                                                                                                                             |

SCHOLARONE™  
Manuscripts

1  
2  
3 **The impact of mobile applications on adherence to cancer treatment: a**  
4 **systematic review and meta-analysis protocol**  
5  
6  
7

8 Kleyton Santos de Medeiros,<sup>1</sup> Janice França Queiroz,<sup>1</sup> Michelly Nóbrega  
9 Monteiro,<sup>1</sup> Weruska Alcoforado Costa,<sup>1</sup> Ricardo Ney Cobucci,<sup>2</sup> Beatriz  
10 Stransky,<sup>3</sup> Ana Katherine Goncalves<sup>1,2</sup>  
11  
12  
13  
14

15 <sup>1</sup>Postgraduate Program in Health Sciences, Federal University of Rio Grande  
16 do Norte, Natal, Brazil

17 <sup>2</sup>Postgraduate Program in Biotechnology, Potiguar University, UnP Natal, Brazil

18 <sup>3</sup>Department of Gynecology and Obstetrics, Federal University of Rio Grande  
19 do Norte, Natal, Brazil

20 <sup>4</sup>Department of Biomedical Engineering, Federal University of Rio Grande do  
21 Norte, Natal, Brazil  
22  
23

24 \*Correspondence to

25 Ana Katherine Gonçalves;

26 Address: Cel Joaquim Manuel St, Natal, RN

27 59012-000, Brazil

28 Phone: +55 84 99982 8237

29 E-mail address: anakatherine\_ufrnet@yahoo.com.br  
30  
31  
32  
33  
34  
35  
36  
37  
38  
39  
40

41 Word count (excluding title page, abstract, references, figures and tables): 2620  
42  
43  
44  
45  
46  
47  
48  
49  
50  
51  
52  
53  
54  
55  
56  
57  
58  
59  
60

## ABSTRACT

### Introduction

The number of patients taking oral chemotherapy is increasing around the world. It is essential to maximize the adherence to oral chemotherapy to improve the overall survival and life expectancy of the patients. In this systematic review and meta-analysis, we aim to evaluate the effectiveness of mobile applications in improving the adherence to oral chemotherapy and adjuvant hormonal therapy in cancer survivors.

### Methods and analysis

MEDLINE, Embase, LILACS, clinicaltrials.gov, Scopus, and the Cochrane Central Register of Controlled Trials will be searched for randomized or quasi-experimental studies published between January 2009 and July 2019. This systematic review and meta-analysis will include studies investigating the use of mobile applications by cancer survivors to aid adherence to oral chemotherapy and adjuvant hormonal therapy. Patient education, reminder tools, calendars, pillboxes, and electronic reminders will not be evaluated. The primary outcome will be the improvement in adherence to anti-cancer drugs. The secondary outcomes will be an improvement in the overall survival and life expectancy, improved quality of life, and control of cancer-related symptoms. Three independent reviewers will select the studies and extract data from the original publications. The risk of bias will be assessed using the Cochrane risk-of-bias tool. Data synthesis will be performed using the Review Manager software (RevMan V.5.2.3). To assess heterogeneity, we will compute the  $I^2$  statistics. Additionally, a quantitative synthesis will be performed if the included studies are sufficiently homogenous.

### Ethics and dissemination

This study will be a review of the published data, and thus, ethical approval is not required. Findings of this systematic review will be published in a peer-reviewed journal.

**Trial registration number:** International Prospective Register of Systematic Reviews (PROSPERO) 2018: CRD42018102172.

## Strengths and limitations of this study

- This systematic review and meta-analysis aims to combine the results of different studies that have comparable effect sizes and can be computed.
- Three reviewers will independently select the eligible studies, extract data without different variables, and assess the risk of bias.
- There is a possibility that we get a small sample size and a limited number of studies; this may influence the validity and reliability of the findings.
- Different types of mobile applications may cause considerable heterogeneity that could limit generating convincing conclusions.
- Despite these limitations, the findings of this systematic review and meta-analysis may suggest whether mobile applications or other approaches are more useful in improving the adherence to oral chemotherapeutic treatment.

## INTRODUCTION

### Description of the condition

About 25% of the new antineoplastic agents under development are estimated to be oral drugs. Notably, the number of oral chemotherapeutic drugs will be more than doubled over the next few years.[1-3] Compared with intravenous (IV) therapy, oral therapy is more convenient, faster and easier to administer, and requires fewer clinic visits and hence, preferred by the patients.[4,5] Additionally, oral therapy can provide a feeling of control over treatment, reduce the interference of treatment with work and social activities, and eliminate the requirement of traveling to an infusion clinic and the discomfort of inserting an IV line.[2] Once an antineoplastic agent is ordered, the administration is the responsibility of the patient.[5] However, patients and clinicians are facing new challenges in managing adherence to these oral therapies.[6]

Most patients attempt to adhere to the treatment according to the prescription, nevertheless, adherence continues to be a problem. It is difficult to obtain a reliable estimate of adherence to oral antineoplastic therapies from the literature. This is because the few intervention studies that have been



1  
2  
3 conducted on treatment adherence have notable methodological concerns.  
4 Thus, there is limited evidence to promote treatment adherence in patients with  
5 cancer.[6] Moreover, studies on non-adherence to treatment and  
6 pharmacological limitations are inadequate.[3]  
7  
8  
9

10  
11  
12 Hershman et al.[7] showed that the interventions to enhance the psychosocial  
13 well-being of patients should be evaluated to increase treatment adherence.  
14 Furthermore, the authors explained that adherence to therapy has been  
15 reported to be associated with belief in the efficacy of the drug and with belief in  
16 the benefits of taking prescribed drugs; and a high level of cancer-specific  
17 emotional distress was associated with subsequent non-adherence to  
18 treatment. Another study suggested that poor physician-patient communication,  
19 negative feeling regarding the efficacy of the drugs, and fear of toxicities were  
20 associated with failure to initiate the therapy.[6]  
21  
22  
23  
24  
25  
26  
27  
28  
29

30  
31 In a systematic review, Greer et al.[6] assessed the interventions to improve  
32 adherence to oral antineoplastic therapies in patients with various malignancies.  
33 These interventions included educational support, monitoring treatment,  
34 pharmacy-based programs, counseling programs, and use of pre-filled pillboxes  
35 and automated voice response systems. Nevertheless, most of the studies  
36 included in this systematic review had a high risk of bias due to non-randomized  
37 designs, small sample sizes, subjective assessments of adherence, and  
38 missing data. In another systematic review of interventions to promote  
39 adherence to oral antineoplastic therapies, the investigators drew similar  
40 conclusions, as problems non-adherence to treatment.[8]  
41  
42  
43  
44  
45  
46  
47  
48  
49

50  
51 A variety of education, symptom management, and reminder-based  
52 interventions, which involve face-to-face interactions, phone calls, and texting  
53 SMS have been developed and tested. However, the effectiveness of these  
54 interventions remains inconclusive.[9-11]  
55  
56  
57  
58  
59

## 60 **Description of the intervention**

1  
2  
3 The American Society of Clinical Oncology/Oncology Nursing Society  
4 recommends educating patients on the administration of oral chemotherapy  
5 (12). This includes the following:  
6  
7

- 8 • The storage, handling, preparation, administration, and disposal of oral  
9 chemotherapeutic drugs.
- 10 • Concurrent anti-cancer treatment and supportive drugs/measures (when  
11 applicable).
- 12 • Possible drug-drug and drug-food interactions.
- 13 • A plan for missed doses.[12]

14  
15  
16  
17  
18  
19  
20  
21 The oncology nurses can use tools and technology to assist with education,  
22 which may promote treatment adherence. In this context, patient education  
23 programs, and physical devices such as pillboxes and glowing pill bottles have  
24 been developed. Additionally, computer and mobile applications have paved the  
25 way for electronic reminders, such as calendars, text messaging, and alarms.[5,  
26 13-14]  
27  
28  
29  
30  
31

32  
33  
34 Mobile applications are softwares that support a wide range of function of the  
35 mobile phone, including television, telephone, video, music, word processing,  
36 and internet service.[15] The first drug reminder application was developed in  
37 2009.[5,6] Mobile applications have several advantages compared with other  
38 interventions; this include simple and easy use, often in an automated fashion  
39 using a computerized program.[6] Thus, mobile applications may be used to  
40 encourage healthy lifestyles while monitoring, tracking, collecting, and  
41 transmitting data in real-time, facilitating the doctor-patient communication, and  
42 increasing the co-operation between the patient and health professionals.[7]  
43  
44  
45  
46  
47  
48  
49

50  
51 Several techniques may increase treatment adherence, the most effective being  
52 behavioral approaches. However, there is no consensus on which behavioral  
53 techniques (such as specific goal-setting, self-monitoring, and social  
54 comparison) are most effective in promoting treatment adherence.[7]  
55  
56  
57  
58  
59  
60

1  
2  
3 With the ever-increasing use of smartphones and development of potentially  
4 effective behavioral intervention technologies, scientists may be able to collect  
5 data in real-time in a real-world setting. Additionally, researchers are able to  
6 optimize the delivery of behavioral interventions and collect data with minimal  
7 burden to the patient and provider.[11] Recently, a review suggested that  
8 adopting mobile technologies to deliver accessible interventions could improve  
9 health behaviors in patients with cancer.[13]

### 17 **Intervention mechanisms**

19 Adherence remains a complicated issue in the treatment of chronic diseases.  
20 [8-14,16-18] In this context, the benefits of using technology, even in the form of  
21 a simple text message, have been recognized.[19] This may improve  
22 adherence to the prescribed dosage, with an increase in adherence rates  
23 ranging from 50% to 67.8%.[14] Mobile applications are suitable for delivering  
24 various educational and behavioral interventions while enabling caregivers and  
25 health professionals to monitor the patients' drug consumption patterns.[10]

### 33 **Why it is important to perform this review**

35 The traditional interventions to improve long-term treatment adherence are  
36 complex and not widely used. There is a widespread need for innovations that  
37 would provide convenient and feasible techniques to help patients remain  
38 adherent to the treatment.[18]

45 Currently, the average rate of non-adherence to oral anti-cancer therapy is  
46 estimated to be around 21%.[4] This demonstrates that poor adherence is a  
47 barrier to completing the treatment.[18,19] Non-adherence is complex and  
48 systemic; moreover, when at home, there is no professional method to know  
49 whether patients are correctly taking the drugs as prescribed. Oral regimens  
50 may be associated with complicated dosing schedules; additionally, due to  
51 food-drug interactions treatment adherence may become difficult. In busy  
52 clinics, patients may be given documents about the new drug(s);however, the  
53 time available for one-on-one interaction may not be sufficient.[5] Ensuring

1  
2  
3 patient adherence to a treatment that involves self-administration is a challenge  
4 faced by health care providers.[2,20] Many factors can affect treatment  
5 adherence: lack of understanding regarding proper administration, complex  
6 dosing regimens, administration of other potentially interacting drugs, the timing  
7 of drug doses with respect to food intake, cost of the drug, and unpleasant side  
8 effects. Furthermore, common health conditions of the patients such as visual  
9 and cognitive impairment, memory deficits, or forgetfulness can pose additional  
10 difficulties.[2]

11  
12  
13  
14  
15  
16  
17  
18  
19 Poor adherence has been linked to successive hospitalization, increased need  
20 for medical interventions, morbidity, and mortality. Furthermore, non-adherence  
21 results in increased healthcare costs, with North America having estimates of  
22 approximately \$100 billion being spent annually and \$2000 spent per patient  
23 per year for additional visits to the physician.[19] It is necessary to verify if the  
24 use of mobile applications can help the patients to overcome these difficulties  
25 and improve treatment adherence. Despite the increased use of oral  
26 chemotherapy, the number of studies addressing the issue of adherence  
27 remains surprisingly low.[20]

## 36 **Objectives**

37  
38 The aim of this systematic review and meta-analysis is to evaluate the  
39 effectiveness of mobile applications in improving adherence to oral  
40 chemotherapy and adjuvant hormonal therapy in cancer survivors.

## 45 **METHODS AND ANALYSIS**

46  
47  
48 This protocol is registered with the International Prospective Register of  
49 Systematic Reviews (PROSPERO); registration number is CRD42018102172.  
50 The Preferred Reporting Items for Systematic Reviews and Meta-Analyses  
51 (PRISMA)[21] guidelines were used to design this systematic review protocol.

## 57 **Inclusion criteria**

1  
2  
3 This systematic review will include the following studies: those with randomized  
4 or quasi-experimental designs; those that include patients aged >18 years; and  
5 those that evaluate the use of mobile applications by cancer survivors for  
6 adherence to oral chemotherapy and adjuvant hormonal therapy. There will be  
7 no language restrictions while selecting the studies.  
8  
9  
10  
11  
12

### 13 **Patient, intervention, comparison, and outcome strategy**

- 14 • Patient: those undergoing oral chemotherapy or adjuvant hormonal therapy.
- 15 • Intervention: use of mobile applications.
- 16 • Comparator/control: no use of mobile applications.
- 17 • Outcome: improvement adherence to anti-cancer treatment.

### 18 **Types of patients**

19 Studies where the patients are aged >18 years, diagnosed with cancer,  
20 undergoing oral chemotherapy or adjuvant hormonal therapy, and using mobile  
21 applications to improve treatment adherence will be included in this systemic  
22 review.  
23  
24  
25

### 26 **Type of interventions**

27 Studies that compare the use of mobile applications with a concurrent control  
28 group to evaluate treatment adherence will be included in this systemic review.  
29  
30  
31  
32  
33  
34

### 35 **Type of outcome measures**

36 Non-adherence may lead to additional treatment costs due to the increased  
37 frequency of hospitalization and medical appointments, recurrence of  
38 symptoms, and consequent increase in drug toxicity caused by an overdose (to  
39 make up for the missed dose).[4, 22-25]  
40  
41  
42  
43  
44

45 The primary outcome will be to assess the improvement in treatment  
46 adherence.[17] The secondary outcomes will be to assess the improvement in  
47 overall survival and life expectancy, improved quality of life, and control of  
48 cancer-related symptoms.[9-11]  
49  
50  
51  
52  
53  
54  
55  
56  
57  
58  
59  
60

## Patient and public involvement

This is a protocol for a systematic review and meta-analysis; the research will be conducted based on a wide and comprehensive literature search from relevant databases; the individual patient data will not be included. Thus, patients will not be involved while setting the search terms, in determining outcome measures, implementing study design, and analyzing the results.

## Search strategy

The Cochrane Central Register of Controlled Trials, clinicaltrials.gov, Medline, LILACS, Scopus, and Embase will be used to search for articles published between January 2009 and July 2019. We selected the publications starting from January 2009 because the first drug reminder application was developed in 2009.[5,6]

The MESH terms will be: (antineoplastic agents OR oral anticancer agents OR drug therapy) AND (mobile application OR mobile apps OR app OR smartphone OR health informatics OR mobile health) AND (medication adherence OR patient empowerment OR treatment adherence and compliance) [Table 1].

Eligible studies will also be selected from the reference lists of the retrieved articles.

**Table 1 Medline search strategy**

| <b>Search items</b> |                        |
|---------------------|------------------------|
| <b>1</b>            | Antineoplastic agents  |
| <b>2</b>            | Oral anticancer agents |
| <b>3</b>            | Drug therapy           |
| <b>4</b>            | OR/1-3                 |
| <b>5</b>            | Mobile application     |
| <b>6</b>            | Mobile apps            |
| <b>7</b>            | Smartphone             |
| <b>8</b>            | Health informatics     |
| <b>9</b>            | Mobile health          |
| <b>10</b>           | OR/5-9                 |
| <b>11</b>           | Medication adherence   |
| <b>12</b>           | Patient participation  |
| <b>13</b>           | Patient compliance     |

1  
2  
3  
4 **14** Treatment adherence and compliance  
5  
6

7 **15** Medication therapy management  
8  
9

10  
11 **16** OR/11-15  
12  
13

14 **17** 4 AND 10 AND 16  
15  
16

---

## 17 18 19 20 **Data collection and analysis**

### 21 22 **Selection of studies**

23  
24 Three authors, KSM, WAC, and JFQ, will independently screen the search  
25 results using the titles and abstracts. Duplicate studies and reviews will be  
26 excluded. Two reviewers, KSM and MNM, will then go through the full text to  
27 determine whether the studies meet the inclusion criteria. Discrepancies will be  
28 resolved by a third reviewer, AKG. The selection of the studies is summarized in  
29 a PRISMA flow diagram (figure 1).  
30  
31  
32  
33  
34  
35

36 Insert **Figure 1**: PRISMA flow diagram.  
37  
38  
39

### 40 41 **Data extraction and management**

42 Various characteristics of the eligible studies will be extracted, including the first  
43 authors' last names, year of publication, location of the study (country), study  
44 design, primary objective, population, sample size, follow-up period,  
45 inclusion/exclusion criteria, type of mobile application used, type of control, and  
46 primary results. Standardized data extraction forms will specifically be created  
47 for this review and the results will be subsequently entered into a database. All  
48 data entries will be double-checked.  
49  
50  
51  
52  
53  
54  
55

### 56 57 **Addressing missing data**

58 We will attempt to obtain any missing data by contacting the first or  
59 corresponding authors or coauthors of an article via phone, email, or post. If we  
60



1  
2  
3 fail to receive any necessary information, the data will be excluded from our  
4 analysis and will be addressed in the discussion section.  
5  
6  
7

### 8 **Risk of bias assessment**

9  
10 Three authors, KSM, JFQ, and BS, will independently assess the risk of bias in  
11 the eligible studies using the Cochrane risk-of-bias tool.[25] The modified  
12 Cochrane Collaboration tool will be used to assess the risk of bias. Bias is  
13 assessed as a judgment (high, low, or unclear) for individual elements from five  
14 domains (selection, performance, attrition, reporting, and other).  
15  
16  
17  
18  
19

### 20 **Assessment of heterogeneity**

21  
22 The heterogeneity between study results will be evaluated using a standard  $X^2$   
23 test with a significance level of  $p < 0.1$ . To assess heterogeneity, we plan to  
24 compute the  $I^2$  statistic, which is a quantitative measurement of inconsistency  
25 across studies. A value of 0% indicates no heterogeneity, whereas  $I^2$  values  
26  $\geq 50\%$  indicate a substantial level of heterogeneity; however, heterogeneity will  
27 be assessed only if it is appropriate to conduct a meta-analysis.  
28  
29  
30  
31  
32  
33  
34  
35

### 36 **Analysis**

37  
38 Data will be entered into the Review Manager software (RevMan5.2.3). This  
39 software allows the user to enter protocols; complete reviews; include text,  
40 characteristics of the studies, comparison tables, and study data; and perform  
41 meta-analyses. For dichotomous outcomes, we will extract or calculate the odds  
42 ratio (OR) and 95% confidence interval (CI) for each study. In case of  
43 heterogeneity ( $I^2 \geq 50\%$ ), the random-effects model will be used to combine the  
44 studies to calculate the OR and 95% CI, using the DerSimonian-Laird algorithm  
45 in the meta for package, which provides functions for conducting meta-analyses  
46 in R.  
47  
48  
49  
50  
51  
52  
53  
54  
55

56 Other study characteristics and results will be summarized narratively if the  
57 meta-analysis cannot be performed for all or some of the included studies.  
58 Sensitivity analyses will be used to explore the robustness of the findings  
59  
60

1  
2  
3 regarding the study quality and sample size. This is only possible if we can  
4 conduct a meta-analysis. Sensitivity analyses will be shown in a summary table.  
5  
6  
7

### 8 **Grading quality of evidence**

9  
10 For grading the strength of evidence from the included data, we will use the  
11 Grading of Recommendation Assessment, Development, and Evaluation  
12 (GRADE) approach. The summary of the assessment will be incorporated into  
13 broader measurements to ensure the judgment on the risk of bias, consistency,  
14 directness, and precision.[26]  
15  
16  
17  
18  
19

## 20 **DISCUSSION**

21  
22 Non-adherence to cancer treatment is a very common and relevant clinical  
23 problem, with a significant adverse impact on the healthcare system. In this  
24 systematic review and meta-analysis, we aim to determine the effect of mobile  
25 applications on the improvement of treatment adherence in cancer survivors. In  
26 theory, mobile applications can improve adherence to anti-cancer treatment,  
27 because they can remind the patient to take the medicine on time and assist in  
28 care management.[27, 28] We expect that our study will provide accurate data  
29 to develop effective strategies for adherence to anti-cancer treatment and help  
30 to improve our understanding of the role of mobile applications in this context.  
31  
32  
33  
34  
35  
36  
37  
38  
39

## 40 **ETHICS AND DISSEMINATION**

41  
42 Ethical approval is not required because this systematic review will use the  
43 published data. Findings of this systematic review will be published in a peer-  
44 reviewed journal and will be updated if there is enough new evidence to change  
45 the conclusions of the systematic review.  
46  
47  
48  
49

### 50 **Data sharing**

51  
52 Data used in this systematic review will be cited in the reference list,  
53 irrespective of whether data is generated by the author(s) or by other  
54 researchers. That is, data are publicly available. Findings of this systematic  
55 review will be published in a peer-reviewed journal and updates will be  
56  
57  
58  
59  
60

1  
2  
3 conducted if there is enough new evidence that may cause any change in the  
4 review conclusions.  
5  
6  
7

### 8 **Acknowledgments**

9  
10 The authors acknowledge the assistance provided by the Graduate Program in  
11 Health Sciences of the Federal University of Rio Grande do Norte (UFRN) in  
12 conducting the literature search.  
13  
14  
15

### 16 **Contributors**

17  
18 KSM, BS, and AKG designed this systematic review and meta-analysis. KSM  
19 drafted the manuscript, and AKG revised it. KSM, RNC, and AKG developed  
20 the search strategies and KSM, JFQ, and MNM will implement it. KSM, MNM,  
21 JFQ, and WAC will track potential studies, extract data, and assess the quality;  
22 in case of disagreement between the authors, AKG will advise on the  
23 methodology and will be the referee. RNC will complete the data synthesis. All  
24 authors have approved the final version of this manuscript.  
25  
26  
27  
28  
29  
30  
31

### 32 **Funding**

33  
34 This research received no specific grant from any funding agency in the public,  
35 commercial, or not-for-profit sectors.  
36  
37  
38

### 39 **Competing interests**

40  
41 None declared.  
42  
43

### 44 **Patient consent for publication**

45  
46 Not required.  
47  
48  
49

## 50 **REFERENCES**

- 51  
52 1. Weingart SN, Flug J, Brouillard D, Morway L, Partridge A, Bartel S,  
53 Shulman LN, Connor M. Oral chemotherapy safety practices at US cancer  
54 centers: questionnaire survey. *BMJ*. 2007 Feb 24;334(7590):407.  
55  
56 2. Wood L. A review on adherence management in patients on oral cancer  
57 therapies. *Eur J Oncol Nurs*. 2012 Sep;16(4):432-8.  
58  
59  
60

- 1
- 2
- 3 3. Moody M, Jackowski J. Are patients on oral chemotherapy in your practice
- 4 setting safe? *Clin J Oncol Nurs*. 2010 Jun;14(3):339-46.
- 5
- 6 4. Chabrier M, Bezy O, Mouret MA, Bay JO, Jalenques I. Impact of
- 7 depressive disorders on adherence to oral anti-cancer treatment. *Bull*
- 8 *Cancer*. 2013 Oct;100(10):1017-22.
- 9
- 10 5. Burhenn, P.S.; Smudde, J. Using tools and technology to promote
- 11 education and adherence to oral agents for cancer. *Clin J Oncol Nurs*.
- 12 2015 Jun;19(3 Suppl):53-9.
- 13
- 14 6. Greer JA, Amoyal N, Nisotel L, Fishbein JN, MacDonald J, Stagl J, Lennes
- 15 I, Temel JS, Safren SA, Pirl WF. A Systematic Review of Adherence to
- 16 Oral Antineoplastic Therapies. *Oncologist*. 2016 Mar;21(3):354-76.
- 17
- 18 7. Hershman DL, Kushi LH, Hillyer GC, Coromilas E, Buono D, Lamerato L,
- 19 Bovbjerg DH, Mandelblatt JS, Tsai WY, Zhong X, Jacobson JS, Wright JD,
- 20 Neugut AI. Psychosocial factors related to non-persistence with adjuvant
- 21 endocrine therapy among women with breast cancer: the Breast Cancer
- 22 Quality of Care Study (BQUAL). *Breast Cancer Res Treat*. 2016
- 23 May;157(1):133-43.
- 24
- 25 8. Mathes T, Antoine SL, Pieper D, Eikermann M. Adherence enhancing
- 26 interventions for oral anticancer agents: a systematic review. *Cancer Treat*
- 27 *Rev*. 2014 Feb;40(1):102-8.
- 28
- 29 9. Ali EE, Chan SSL, Leow JL, Chew L, Yap KY. User acceptance of an app-
- 30 based adherence intervention: Perspectives from patients taking oral
- 31 anticancer medications. *J Oncol Pharm Pract*. 2019 Mar;25(2):390-397.
- 32
- 33 10. Ali EE, Chan SSL, Poh HY, Susanto YA, Suganya T, Leow JL, Pang CK,
- 34 Chew L, Yap KY. Design Considerations in the Development of App-
- 35 Based Oral Anticancer Medication Management Systems: a Qualitative
- 36 Evaluation of Pharmacists' and Patients' Perspectives. *J Med Syst*. 2019
- 37 Feb 6;43(3):63.
- 38
- 39 11. Fishbein JN, Nisotel LE, MacDonald JJ, Amoyal Pensak N, Jacobs JM,
- 40 Flanagan C, Jethwani K, Greer JA. Mobile Application to Promote
- 41 Adherence to Oral Chemotherapy and Symptom Management: A Protocol
- 42 for Design and Development. *JMIR Res Protoc*. 2017 Apr 20;6(4):e62.
- 43
- 44 12. Neuss MN, Polovich M, McNiff K, Esper P, Gilmore TR, LeFebvre KB,
- 45 Schulmeister L, Jacobson JO. 2013 updated American Society of Clinical
- 46
- 47
- 48
- 49
- 50
- 51
- 52
- 53
- 54
- 55
- 56
- 57
- 58
- 59
- 60

- 1  
2  
3 Oncology/Oncology Nursing Society chemotherapy administration safety  
4 standards including standards for the safe administration and  
5 management of oral chemotherapy. *J Oncol Pract.* 2013 Mar;9(2  
6  
7  
8 Suppl):5s-13s.  
9
- 10  
11 13. Darlow S, Wen K. Development testing of mobile health interventions for  
12 cancer patient self-management: A review. *Health Informatics J.* 2015 Apr  
13 27:1-18.  
14
- 15  
16 14. Jacobs JM, Pensak NA, Sporn NJ, MacDonald JJ, Lennes IT, Safren SA,  
17 Pirl WF, Temel JS, Greer JA. Treatment Satisfaction and Adherence to  
18 Oral Chemotherapy in Patients With Cancer. *J Oncol Pract.* 2017  
19 May;13(5):e474-e485.  
20
- 21  
22 15. MEDICINE, U.S. National Library Of MEDICINE. Medical Subject  
23 Headings: Mobile Applications. 2018. Evaluable in:  
24 <<https://www.ncbi.nlm.nih.gov/mesh/68063731>>. Accessed in: March 16.  
25  
26  
27 2019.  
28
- 29  
30 16. Elliott M, Liu Y. The nine rights of medication administration: an overview.  
31 *Br J Nurs.* 2010 Mar 11-24;19(5):300-5.  
32
- 33  
34 17. Zerillo JA, Goldenberg BA, Kotecha RR, Tewari AK, Jacobson JO,  
35 Krzyzanowska MK Interventions to Improve Oral Chemotherapy Safety  
36 and Quality: A Systematic Review. *JAMA Oncol.* 2018 Jan 1;4(1):105-117.  
37
- 38  
39 18. Makubi A, Sasi P, Ngaeje M, et al. Rationale and design of mDOT-  
40 HuAstudy: a randomized trial to assess the effect of mobile-directly  
41 observed therapy on adherence to hydroxyurea in adults with sickle cell  
42 anemia in Tanzania. *BMC Med Res Methodol.* 2016 Oct 18;16(1):140.  
43
- 44  
45 19. Thakkar J, Kurup R, Laba, T, et al. Mobile Telephone Text Messaging for  
46 Medication Adherence in Chronic Disease: A Meta-analysis. *JAMA Intern  
47 Med.* 2016 Mar;176(3):340-9.  
48
- 49  
50 20. Barillet M, Prevost V, Joly F, Clarisse B. Oral antineoplastic agents: How  
51 do we care about adherence? *Br J Clin Pharmacol.* 2015 Dec;80(6):1289-  
52 302.  
53
- 54  
55 21. Moher D, Liberati A, Tetzlaff J, Altman DG, PRISMA Group. Preferred  
56 reporting items for systematic reviews and meta-analyses: The PRISMA  
57 Statement *PLoS Med.* 2009 Jul 21;6(7):e1000097.  
58  
59  
60

22. Shimada CS. Adherence to treatment with oral medications. Rio de Janeiro: Elsevier, 2016.
23. Ruddy K, Mayer E, Partridge A. Patient adherence and persistence with oral anticancer treatment. *CA Cancer J Clin*. 2009 Jan-Feb;59(1):56-66.
24. Jingjin, Grant ES, Vernon MS, Oh, Shuchuen, Li S. Factor affecting therapeutic compliance: A review from the patient's perspective. *Ther Clin Risk Manag*. 2008 Feb;4(1):269-86.
25. Higgins JP, Altman DG, Gøtzsche PC, Jüni P, Moher D, Oxman AD, Savovic J, Schulz KF, Weeks L, Sterne JA. The Cochrane Collaboration's tool for assessing risk of bias in randomised trials. *Cochrane Bias Methods Group; Cochrane Statistical Methods Group. BMJ*. 2011 Oct 18;343:d5928.
26. Balshem H, Helfand M, Schünemann HJ, Oxman AD, Kunz R, Brozek J, Vist GE, Falck-Ytter Y, Meerpohl J, Norris S, Guyatt GH. GRADE guidelines: 3. Rating the quality of evidence. *J Clin Epidemiol*. 2011 Apr;64(4):401-6.
27. Jupp JCY, Sultani H, Cooper CA, Peterson KA, Truong TH. Evaluation of mobile phone applications to support medication adherence and symptom management in oncology patients. *Pediatr Blood Cancer*. 2018 Nov;65(11):e27278.
28. Carmody JK, Denson LA, Hommel KA. Content and Usability Evaluation of Medication Adherence Mobile Applications for Use in Pediatrics. *J Pediatr Psychol*. 2019 Apr 1;44(3):333-342.

**Figure 1:** PRISMA flow diagram.

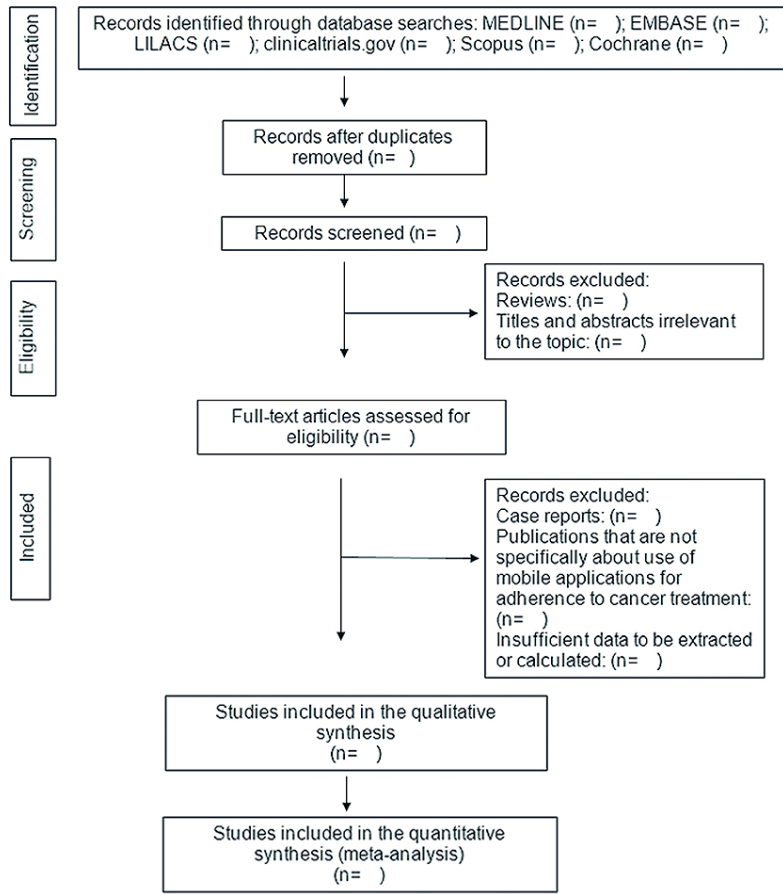

Figure 1 Flow diagram of the search for eligible studies in the use of mobile applications for adherence to cancer treatment: CENTRAL, Cochrane Central Register of Controlled Trials.

Figure 1 Flow diagram of the search for eligible studies in the use of mobile applications for adherence to cancer treatment: CENTRAL, Cochrane Central Register of Controlled Trials.

90x90mm (300 x 300 DPI)

## Additional File 1. PRISMA Checklist

An Editorial from the Editors-in-Chief of *Systematic Reviews* details why this checklist was adapted - Moher D, Stewart L & Shekelle P: Implementing PRISMA-P: recommendations for prospective authors. *Systematic Reviews* 2016;5:15

| Section/topic                     | #  | Checklist item                                                                                                                                                                                  | Information reported |    | Line number(s) |
|-----------------------------------|----|-------------------------------------------------------------------------------------------------------------------------------------------------------------------------------------------------|----------------------|----|----------------|
|                                   |    |                                                                                                                                                                                                 | Yes                  | No |                |
| <b>ADMINISTRATIVE INFORMATION</b> |    |                                                                                                                                                                                                 |                      |    |                |
| <b>Title</b>                      |    |                                                                                                                                                                                                 |                      |    |                |
| Identification                    | 1a | Identify the report as a protocol of a systematic review                                                                                                                                        | √                    |    | 2              |
| Update                            | 1b | If the protocol is for an update of a previous systematic review, identify as such                                                                                                              |                      | √  | N/A            |
| <b>Registration</b>               | 2  | If registered, provide the name of the registry (e.g., PROSPERO) and registration number in the Abstract                                                                                        | √                    |    | 64             |
| <b>Authors</b>                    |    |                                                                                                                                                                                                 |                      |    |                |
| Contact                           | 3a | Provide name, institutional affiliation, and e-mail address of all protocol authors; provide physical mailing address of corresponding author                                                   | √                    |    | 4-21           |
| Contributions                     | 3b | Describe contributions of protocol authors and identify the guarantor of the review                                                                                                             | √                    |    | 397-404        |
| <b>Amendments</b>                 | 4  | If the protocol represents an amendment of a previously completed or published protocol, identify as such and list changes; otherwise, state plan for documenting important protocol amendments |                      | √  | N/A            |
| <b>Support</b>                    |    |                                                                                                                                                                                                 |                      |    |                |
| Sources                           | 5a | Indicate sources of financial or other support for the review                                                                                                                                   | √                    |    | 406-409        |
| Sponsor                           | 5b | Provide name for the review funder and/or sponsor                                                                                                                                               |                      | √  | N/A            |
| Role of sponsor/funder            | 5c | Describe roles of funder(s), sponsor(s), and/or institution(s), if any, in developing the protocol                                                                                              |                      | √  | N/A            |
| <b>INTRODUCTION</b>               |    |                                                                                                                                                                                                 |                      |    |                |
| <b>Rationale</b>                  | 6  | Describe the rationale for the review in the context of what is already known                                                                                                                   | √                    |    | 200-233        |
| <b>Objectives</b>                 | 7  | Provide an explicit statement of the question(s) the review will address with reference to participants, interventions, comparators, and outcomes (PICO)                                        | √                    |    | 255-260        |
| <b>METHODS</b>                    |    |                                                                                                                                                                                                 |                      |    |                |



| Section/topic                             | #   | Checklist item                                                                                                                                                                                                                              | Information reported |    | Line number(s)      |
|-------------------------------------------|-----|---------------------------------------------------------------------------------------------------------------------------------------------------------------------------------------------------------------------------------------------|----------------------|----|---------------------|
|                                           |     |                                                                                                                                                                                                                                             | Yes                  | No |                     |
| <b>Eligibility criteria</b>               | 8   | Specify the study characteristics (e.g., PICO, study design, setting, time frame) and report characteristics (e.g., years considered, language, publication status) to be used as criteria for eligibility for the review                   | √                    |    | 248-260             |
| <b>Information sources</b>                | 9   | Describe all intended information sources (e.g., electronic databases, contact with study authors, trial registers, or other grey literature sources) with planned dates of coverage                                                        | √                    |    | 284-292             |
| <b>Search strategy</b>                    | 10  | Present draft of search strategy to be used for at least one electronic database, including planned limits, such that it could be repeated                                                                                                  | √                    |    | 288-302;<br>Table 1 |
| <b>STUDY RECORDS</b>                      |     |                                                                                                                                                                                                                                             |                      |    |                     |
| Data management                           | 11a | Describe the mechanism(s) that will be used to manage records and data throughout the review                                                                                                                                                |                      | √  | 313-321             |
| Selection process                         | 11b | State the process that will be used for selecting studies (e.g., two independent reviewers) through each phase of the review (i.e., screening, eligibility, and inclusion in meta-analysis)                                                 | √                    |    | 329-334             |
| Data collection process                   | 11c | Describe planned method of extracting data from reports (e.g., piloting forms, done independently, in duplicate), any processes for obtaining and confirming data from investigators                                                        | √                    |    | 313-321             |
| <b>Data items</b>                         | 12  | List and define all variables for which data will be sought (e.g., PICO items, funding sources), any pre-planned data assumptions and simplifications                                                                                       | √                    |    | 255-260             |
| <b>Outcomes and prioritization</b>        | 13  | List and define all outcomes for which data will be sought, including prioritization of main and additional outcomes, with rationale                                                                                                        | √                    |    | 271-281             |
| <b>Risk of bias in individual studies</b> | 14  | Describe anticipated methods for assessing risk of bias of individual studies, including whether this will be done at the outcome or study level, or both; state how this information will be used in data synthesis                        | √                    |    | 329-334             |
| <b>DATA</b>                               |     |                                                                                                                                                                                                                                             |                      |    |                     |
| <b>Synthesis</b>                          | 15a | Describe criteria under which study data will be quantitatively synthesized                                                                                                                                                                 | √                    |    | 285-295             |
|                                           | 15b | If data are appropriate for quantitative synthesis, describe planned summary measures, methods of handling data, and methods of combining data from studies, including any planned exploration of consistency (e.g., $I^2$ , Kendall's tau) | √                    |    | 345-360             |
|                                           | 15c | Describe any proposed additional analyses (e.g., sensitivity or subgroup analyses, meta-regression)                                                                                                                                         | √                    |    | 345-360             |
|                                           | 15d | If quantitative synthesis is not appropriate, describe the type of summary planned                                                                                                                                                          | √                    |    | 355-360             |
| <b>Meta-bias(es)</b>                      | 16  | Specify any planned assessment of meta-bias(es) (e.g., publication bias across studies, selective reporting within studies)                                                                                                                 | √                    |    | 329-334             |

| Section/topic                            | #  | Checklist item                                                                   | Information reported |    | Line number(s) |
|------------------------------------------|----|----------------------------------------------------------------------------------|----------------------|----|----------------|
|                                          |    |                                                                                  | Yes                  | No |                |
| <b>Confidence in cumulative evidence</b> | 17 | Describe how the strength of the body of evidence will be assessed (e.g., GRADE) | √                    |    | 362-367        |

For peer review only
